# Supplementary material for: Bacterial cGAS senses a viral RNA to initiate immunity
Source: PubMed Central journal article supplement (PMC10686824; doi:10.1038/s41586-023-06743-9), 2023-11-15

### Supplementary Figure 1

Original source images for data obtained by spotting phage on lawns of staphylococci

Box indicates location of cropped images in **Figure 1A**

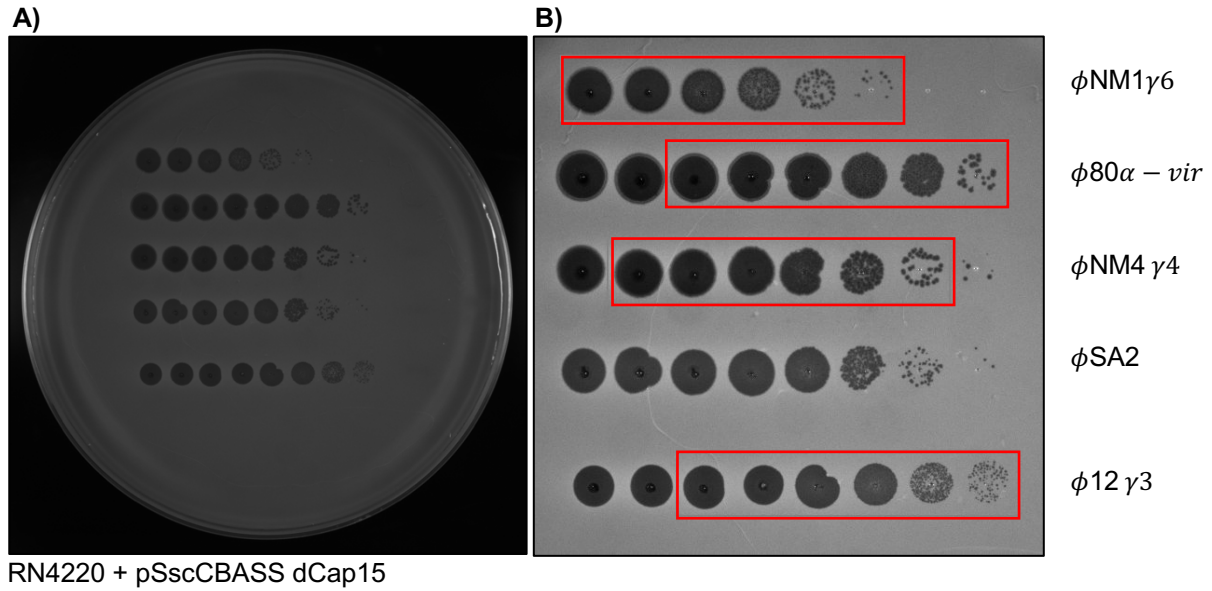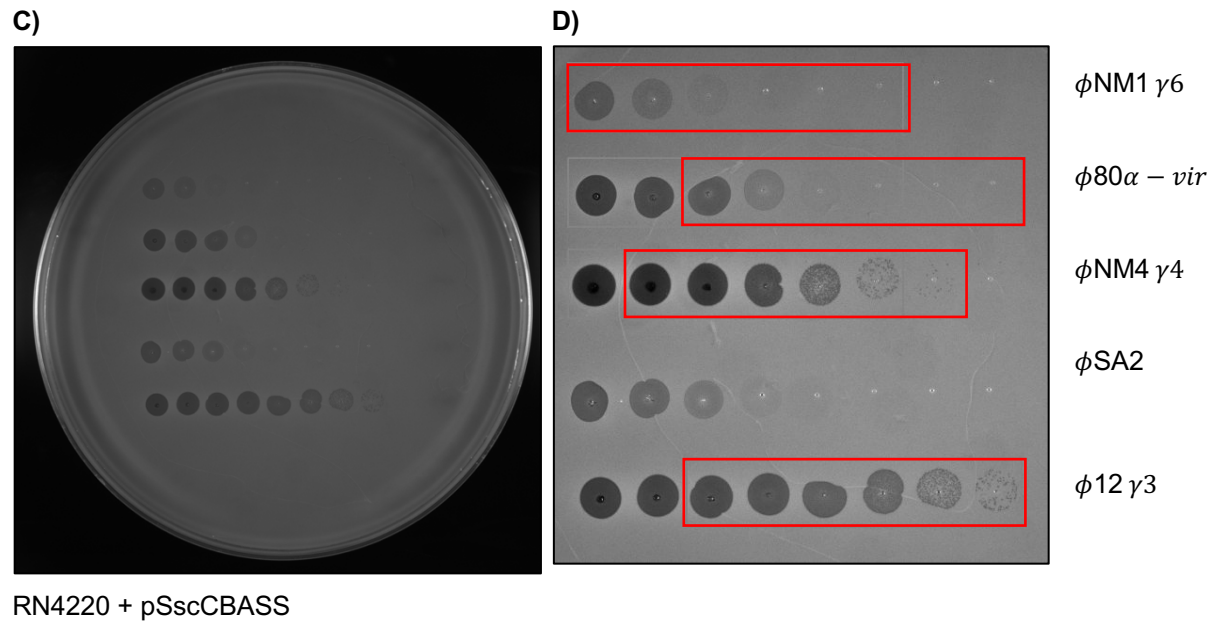

Original source images for data obtained by TLC separation of cyclic nucleotides followed by phosphor screen imaging

Box indicates location of cropped images in **Figure 1B**

E)

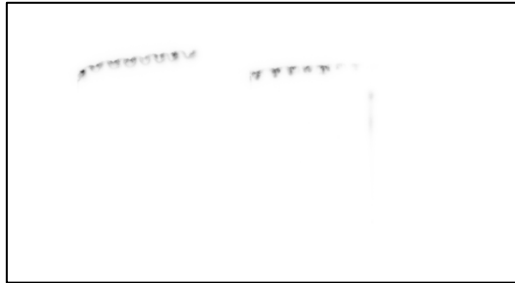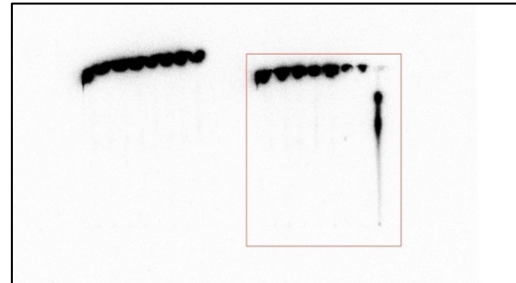

phosphor  
screen  $\alpha$ -<sup>32</sup>P  
NTPs

imageJ auto  
contrast  
applied to  
image on the  
right

F)

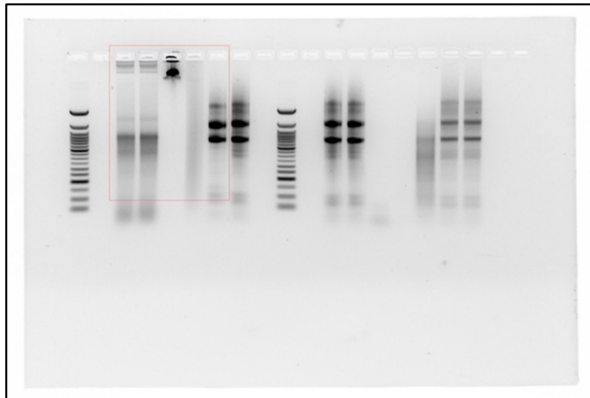

stained with ethidium bromide

Ladder: new England biolabs 50 bp DNA ladder

G)

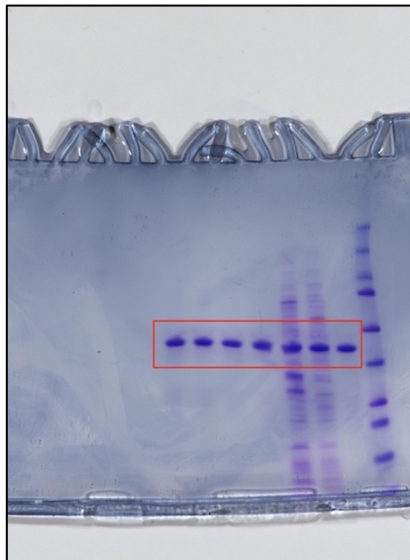

stained with Coomassie

Ladder: Bio-rad Precision Plus Protein Dual Color Standard

Original source images for data obtained by electrophoretic separation

Box indicates location of cropped images in **Figure 1C**

H)

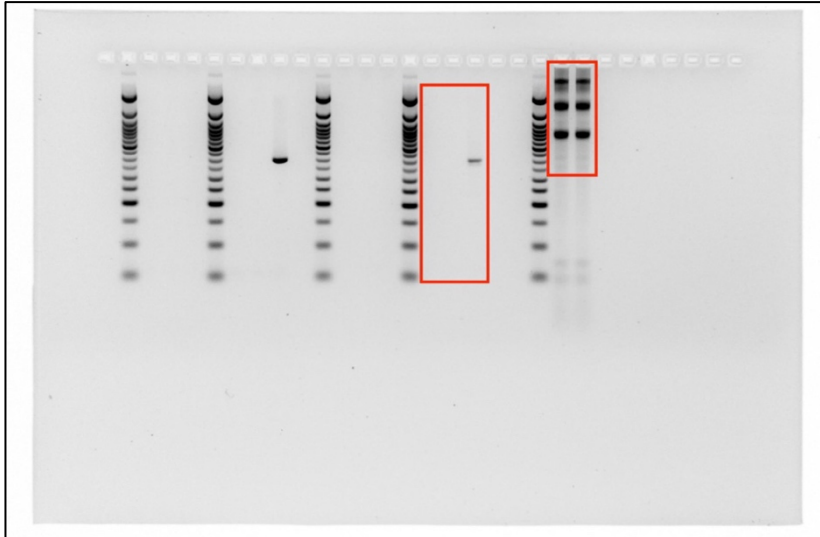

stained with ethidium bromide  
Ladder: new England biolabs 50 bp  
DNA ladder

I)

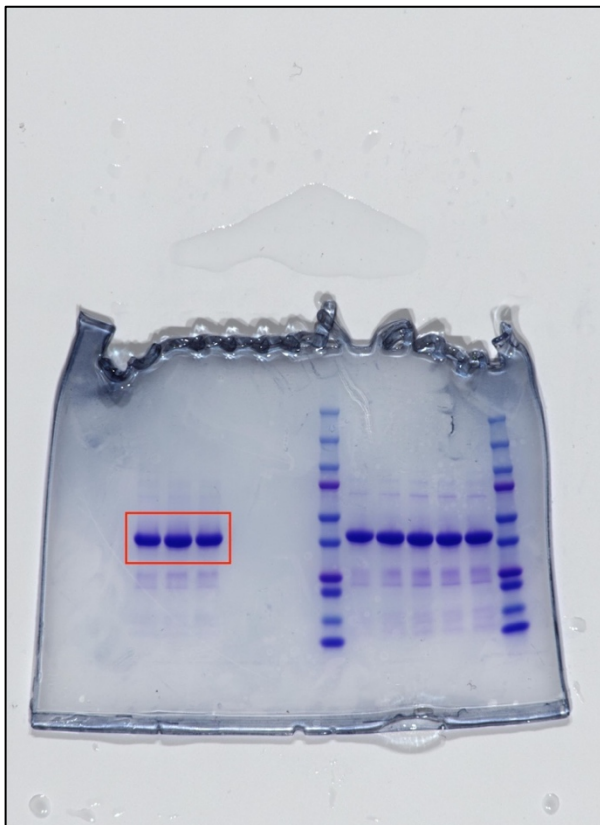

stained with Coomassie blue  
Ladder: Bio-rad Precision Plus Protein Dual Color  
Standard

Original source images for data obtained by electrophoretic separation

Box indicates location of cropped images in **Figure 1D**

J)

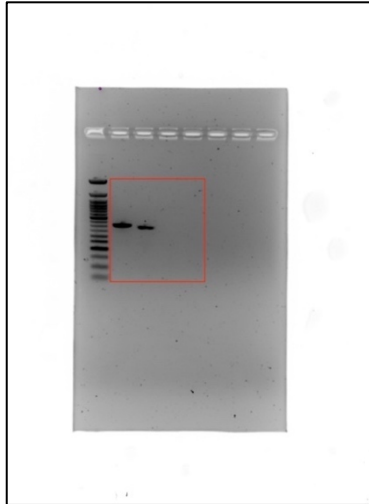

stained with ethidium bromide  
Ladder: new England biolabs 50 bp DNA ladder

K)

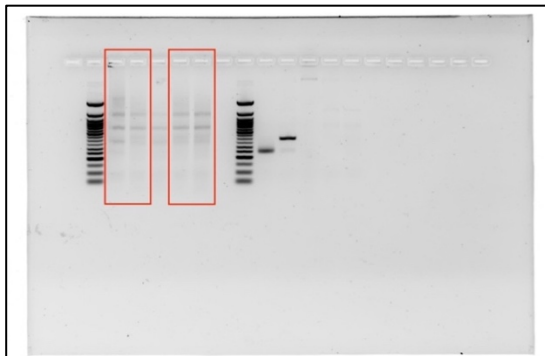

stained with ethidium bromide  
Ladder: new England biolabs 50 bp DNA ladder

L)

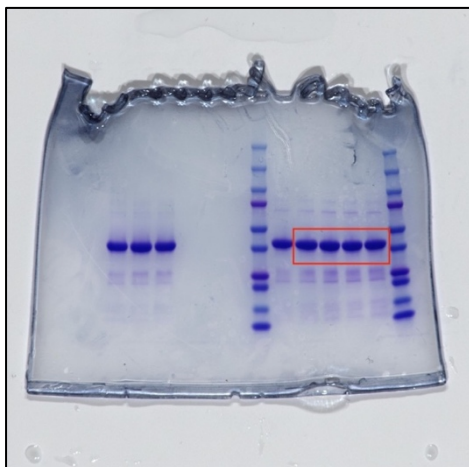

stained with Coomassie blue  
Ladder: Bio-rad Precision Plus Protein Dual Color Standard



Original source images for data obtained by electrophoretic separation & data obtained by TLC separation of cyclic nucleotides followed by phosphor screen imaging

Box indicates location of cropped images in **Figure 1F**

M)

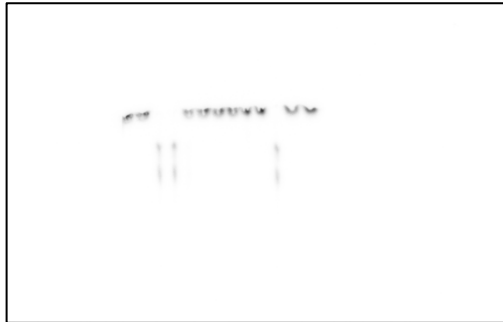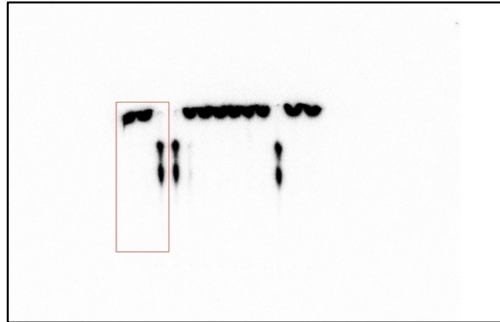

phosphor screen  $\alpha$ -<sup>32</sup>P NTPs

imageJ auto contrast applied to image on the right

N)

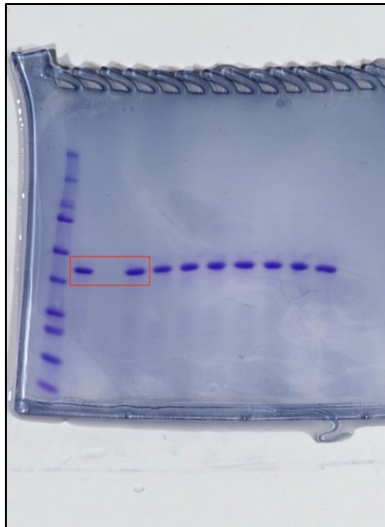

stained with Coomassie blue  
Ladder: Bio-rad Precision Plus Protein Dual Color Standard

O)

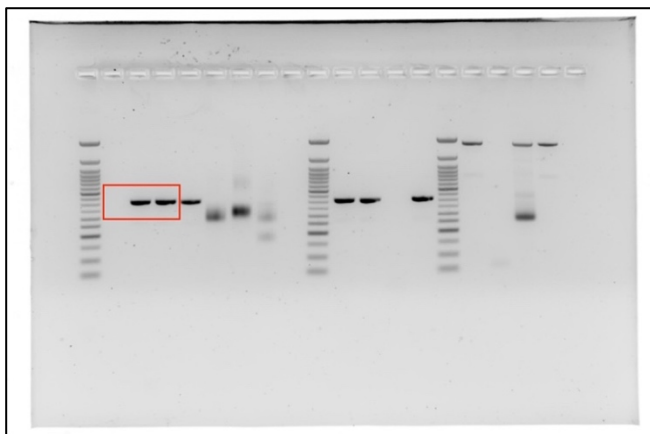

stained with ethidium bromide, Ladder: new England biolabs 50 bp DNA ladder

Original source images for data obtained by electrophoretic separation

Box indicates location of cropped images in **Figure 2A**

**P)**

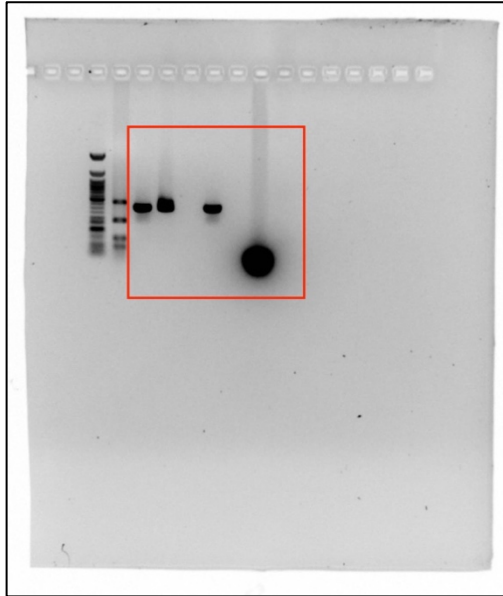

stained with ethidium bromide

Ladder: new England biolabs 50 bp DNA ladder and dsRNA ladder

Original source images for data obtained by electrophoretic separation & data obtained by TLC separation of cyclic nucleotides followed by phosphor screen imaging

Box indicates location of cropped images in **Figure 2B**

**Q)**

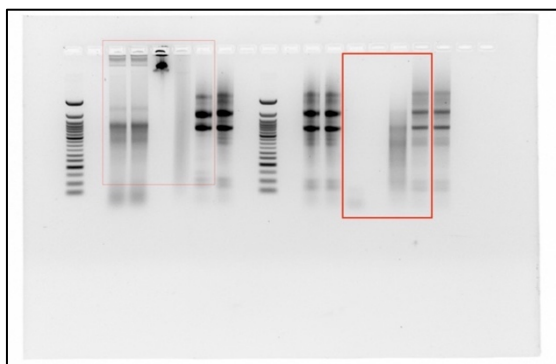

stained with ethidium bromide, Ladder: new England biolabs 50 bp DNA ladder

**R)**

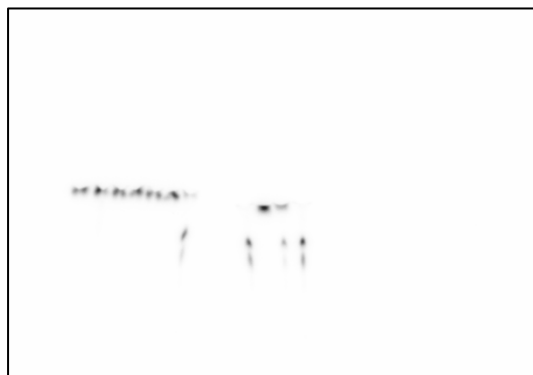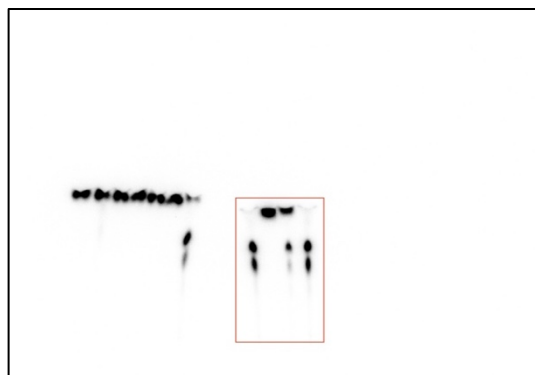

phosphor screen  $\alpha$ -<sup>32</sup>P NTPs

imageJ auto contrast applied to image on the right

Original source images for data obtained by electrophoretic separation

Box indicates location of cropped images in **Figure 2C**

**S)**

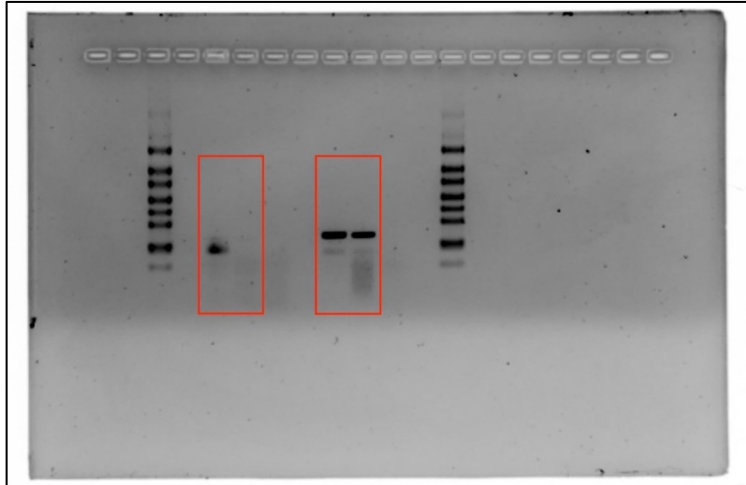

stained with ethidium bromide  
Ladder: new England biolabs 50 bp  
DNA ladder

Original source images for data obtained by electrophoretic separation & data obtained by TLC separation of cyclic nucleotides followed by phosphor screen imaging

Box indicates location of cropped images in **Figure 2D**

T)

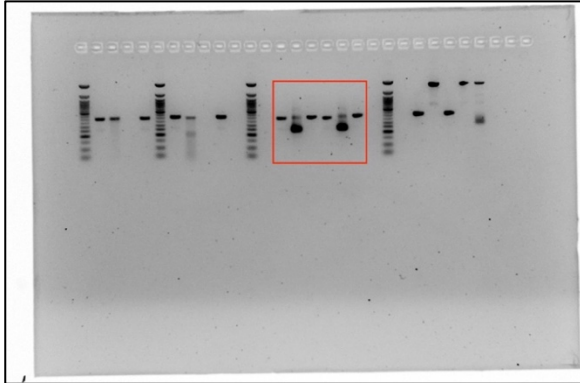

stained with ethidium bromide, Ladder: new England biolabs 50 bp DNA ladder

U)

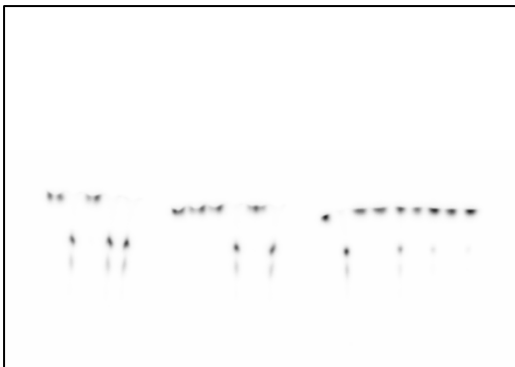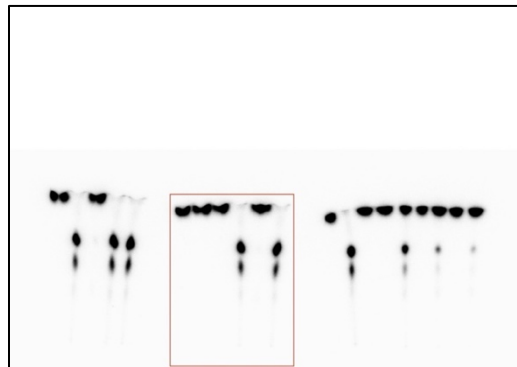

phosphor screen  $\alpha$ -<sup>32</sup>P NTPs

imageJ auto contrast applied to image on the right

Original source images for data obtained by TLC separation of cyclic nucleotides followed by phosphor screen imaging

Box indicates location of cropped images in **Figure 3B**

v)

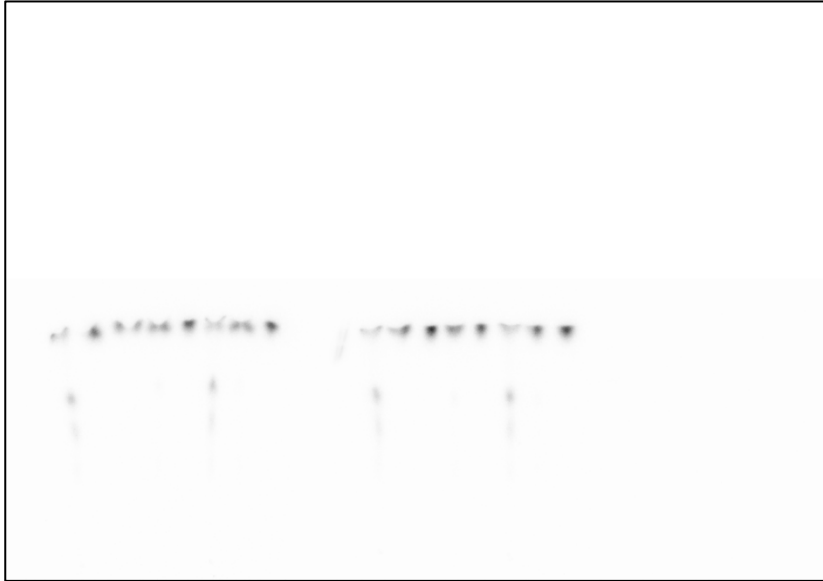

phosphor screen  $\alpha$ -<sup>32</sup>P NTPs

imageJ auto contrast applied to image on the bottom

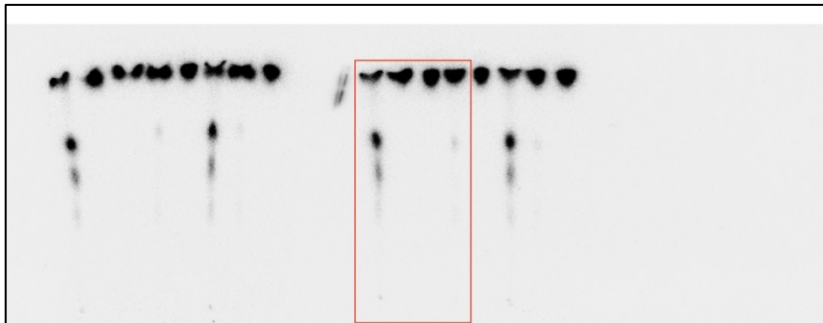



Original source images for data obtained by electrophoretic mobility assay

Box indicates location of cropped images in **Figure 3C**

**W)**

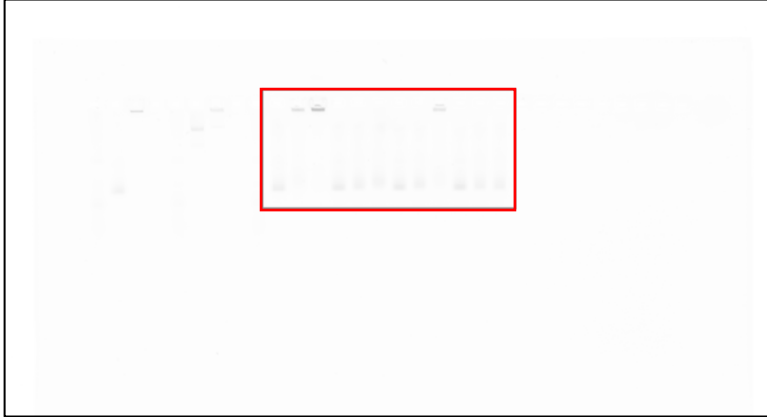

stained with ethidium bromide,  
Ladder: new England biolabs 50 bp  
DNA ladder

Original source images for data obtained by spotting phage on lawns of staphylococci

Box indicates location of cropped images in **Figure S5C**

X)

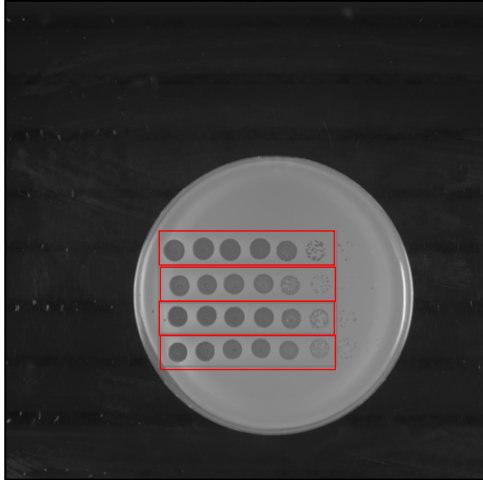

RN4220 + empty vector

Y)

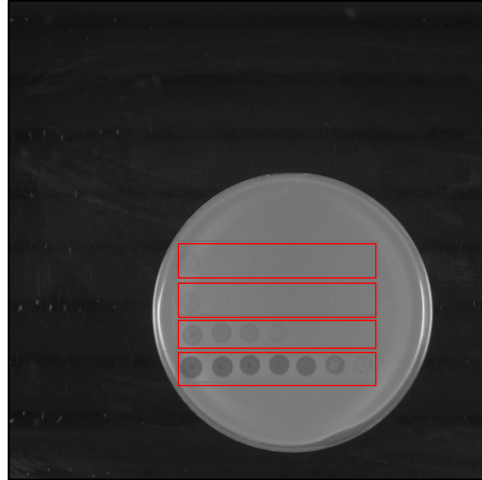

RN4220 + pShaCBASS

$\phi 80\alpha$

$\phi \text{NM1}$

$\phi \text{NM4}$

$\phi 12$

Original source images for data obtained by electrophoretic separation

Box indicates location of cropped images in **Figure S5D**

**Z)**

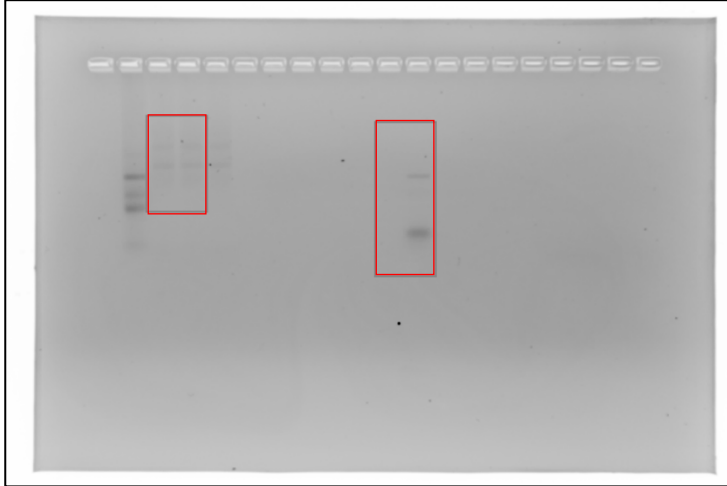

stained with ethidium bromide  
Ladder: new England biolabs dsRNA  
ladder

Original source images for data obtained by spotting phage on lawns of staphylococci

Box indicates location of cropped images in **Figure 4B**

AA)

AB)

AC)

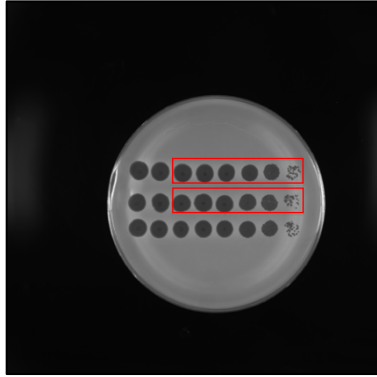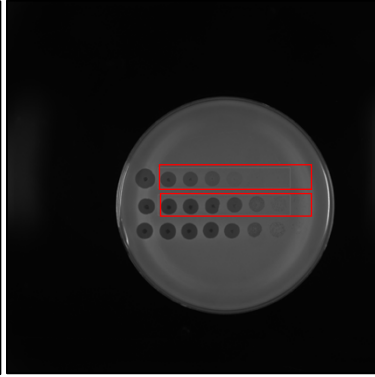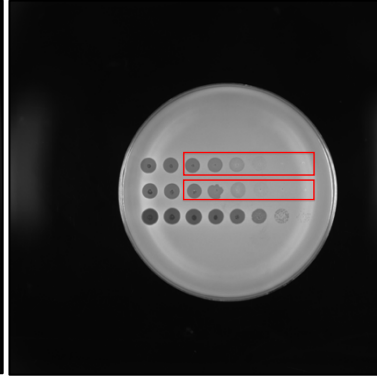

$\phi$ 80 $\alpha$  wt  
 $\phi$ 80 $\alpha$  gp40  
S74F  
 $\phi$ 80 $\alpha$  gp46  
D105E

RN4220 + empty vector

RN4220 + pCBASS

RN4220 + pCBASS + pTerS

Original source images for data obtained by TLC separation of cyclic nucleotides followed by phosphor screen imaging & for data obtained by electrophoretic separation

Box indicates location of cropped images in **Figure 4C**

AD)

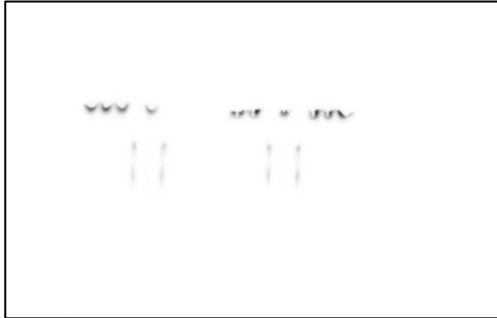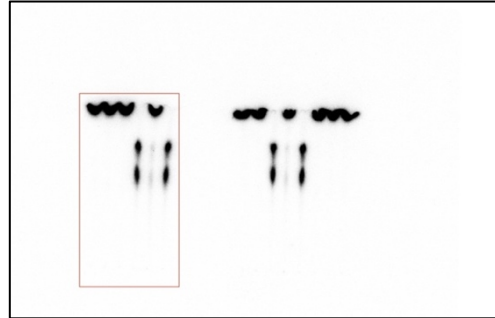

phosphor  
screen  $\alpha$ -<sup>32</sup>P  
NTPs

imageJ auto  
contrast  
applied to  
image on the  
right

AE)

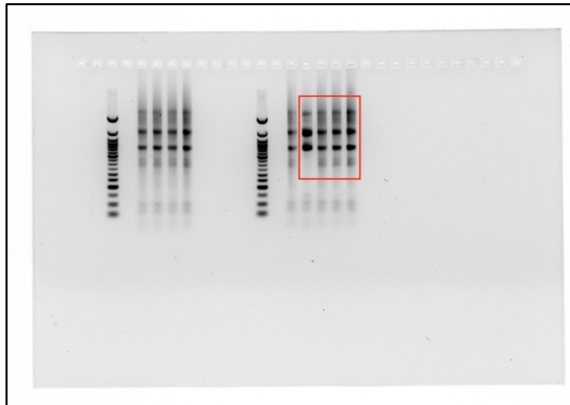

stained with ethidium bromide, Ladder: new England  
biolabs 50 bp DNA ladder

AF)

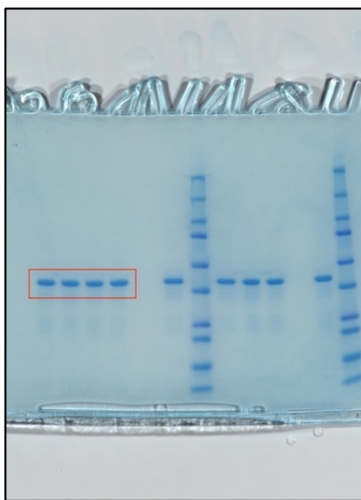

stained with Coomassie blue  
Ladder: Bio-rad Precision Plus Protein Dual Color Standard

Original source images for data obtained by electrophoretic separation

Box indicates location of cropped images in **Figure 4D**

**AG)**

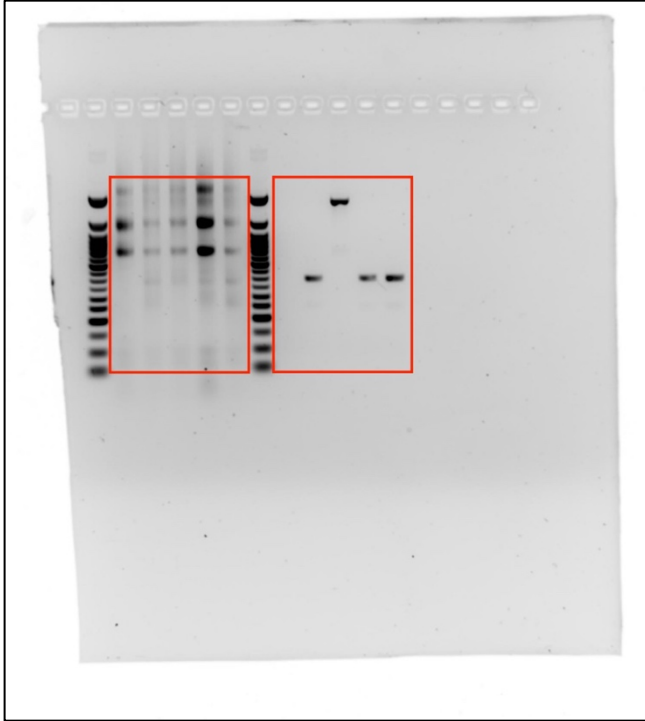

stained with ethidium bromide  
Ladder: new England biolabs 50 bp DNA ladder



Original source images for data obtained by TLC separation of cyclic nucleotides followed by phosphor screen imaging & for data obtained by electrophoretic separation

Box indicates location of cropped images in **Figure 4E**

**AH)**

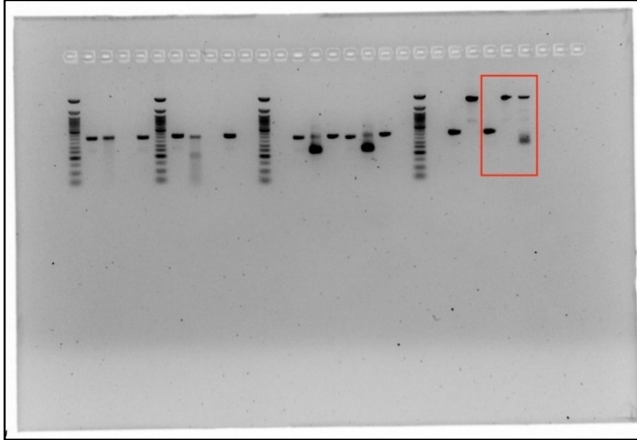

stained with ethidium bromide  
Ladder: new England biolabs 50 bp DNA ladder

**AI)**

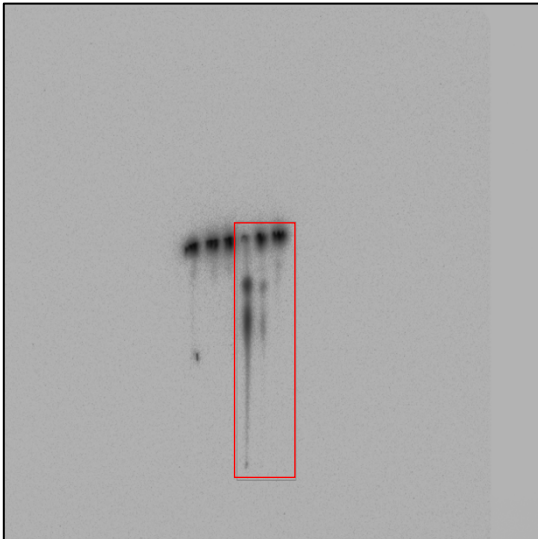

phosphor screen  $\alpha$ -<sup>32</sup>P NTPs

Original source images for data obtained by electrophoretic separation

Box indicates location of cropped images in **Figure 5C**  
**AJ)**

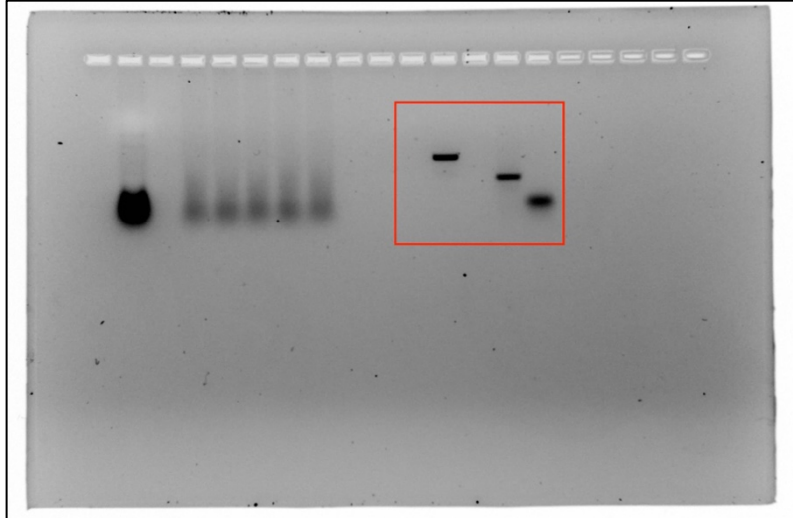

stained with ethidium bromide  
Ladder: new England biolabs low  
range dsRNA ladder

Original source images for data obtained by TLC separation of cyclic nucleotides followed by phosphor screen imaging

Box indicates location of cropped images in **Figure 5D**

**AK)**

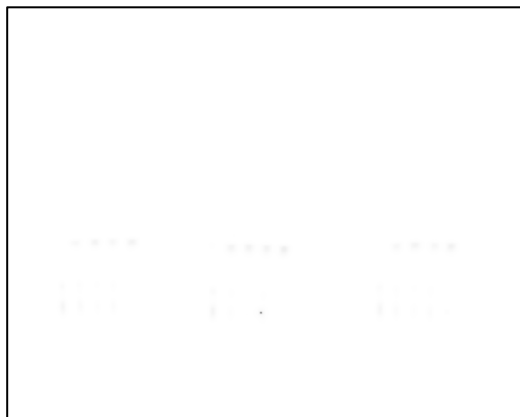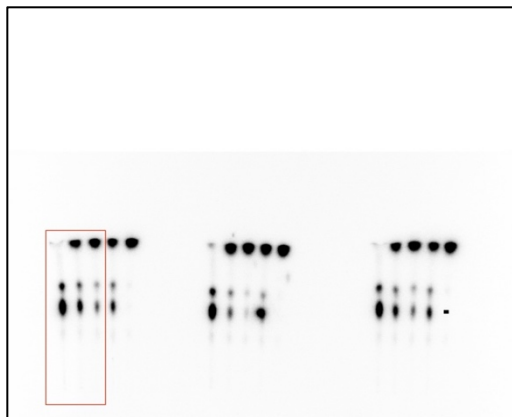

phosphor  
screen  $\alpha$ -<sup>32</sup>P  
NTPs

imageJ auto  
contrast  
applied to  
image on the  
right

Original source images for data obtained by spotting phage on lawns of staphylococci

Box indicates location of cropped images in **Figure 6A**

AL)

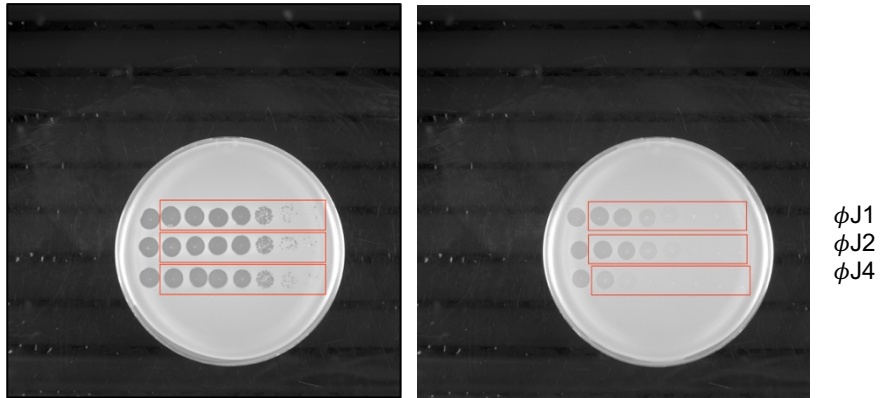

RN4220 + pSscCBASS dCap15

RN4220 + pSscCBASS

Original source images for data obtained by electrophoretic separation

Box indicates location of cropped images in **Figure 6B**

**AM)**

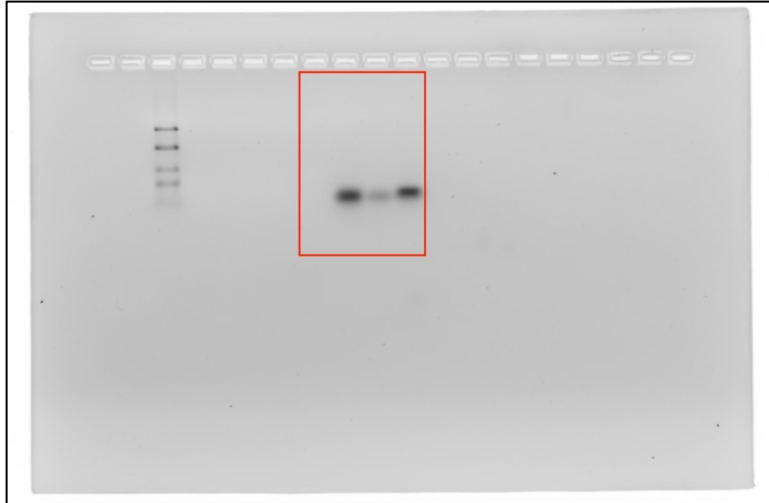

stained with ethidium bromide  
Ladder: new England biolabs low  
range dsRNA ladder

Original source images for data obtained by TLC separation of cyclic nucleotides followed by phosphor screen imaging

Box indicates location of cropped images in **Figure 6C**

**AN)**

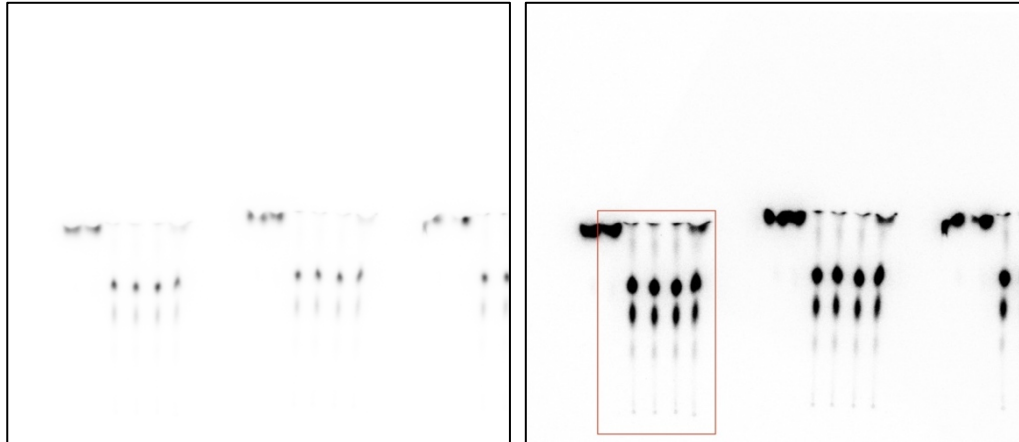

phosphor screen  
 $\alpha$ -<sup>32</sup>P NTPs

imageJ auto  
contrast applied  
to image on the  
right



Original source images for data obtained by TLC separation of cyclic nucleotides followed by phosphor screen imaging

Box indicates location of cropped images in **Figure 6D**

**AO)**

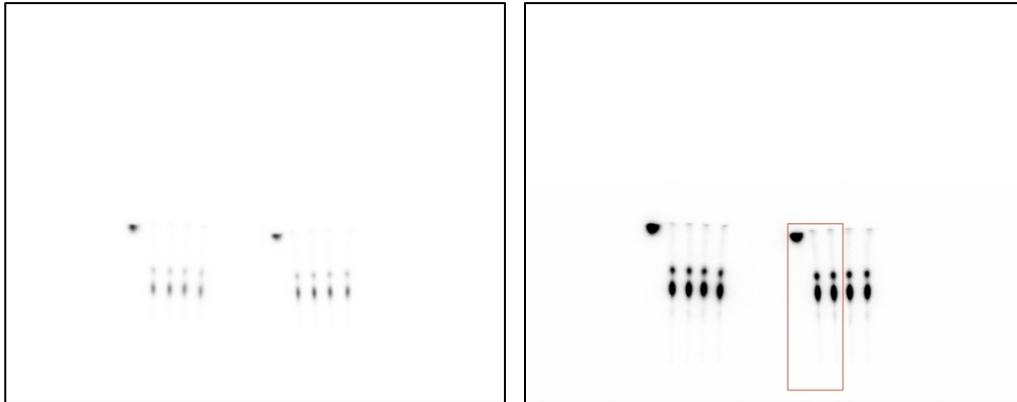

phosphor screen  
 $\alpha$ -<sup>32</sup>P NTPs

imageJ auto  
contrast applied  
to image on the  
right

Original source images for data obtained by spotting phage on lawns of staphylococci

Box indicates location of cropped images in **Figure S1B**

**AP)**

**AQ)**

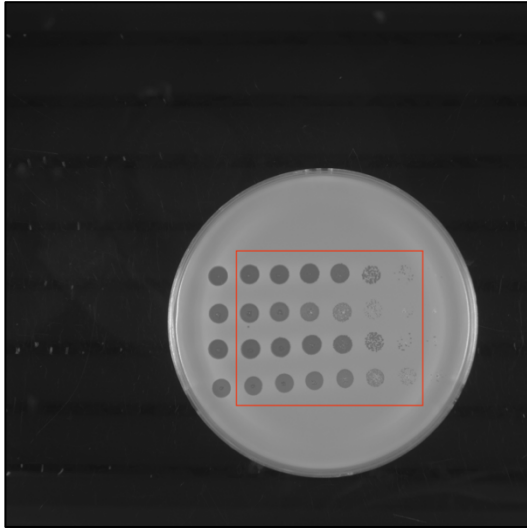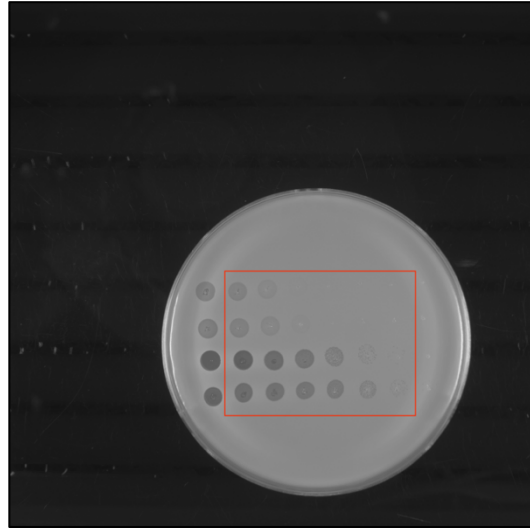

$\phi$ NM1

$\phi$ 80 $\alpha$

$\phi$ NM4

$\phi$ 12

RN4220::SscCdnE03

RN4220::CBASS

Original source images for data obtained by fluorescence confocal microscopy of staphylococci harboring Ssc-CBASS

Box indicates location of cropped images in **Figure S1K**

**AR)**

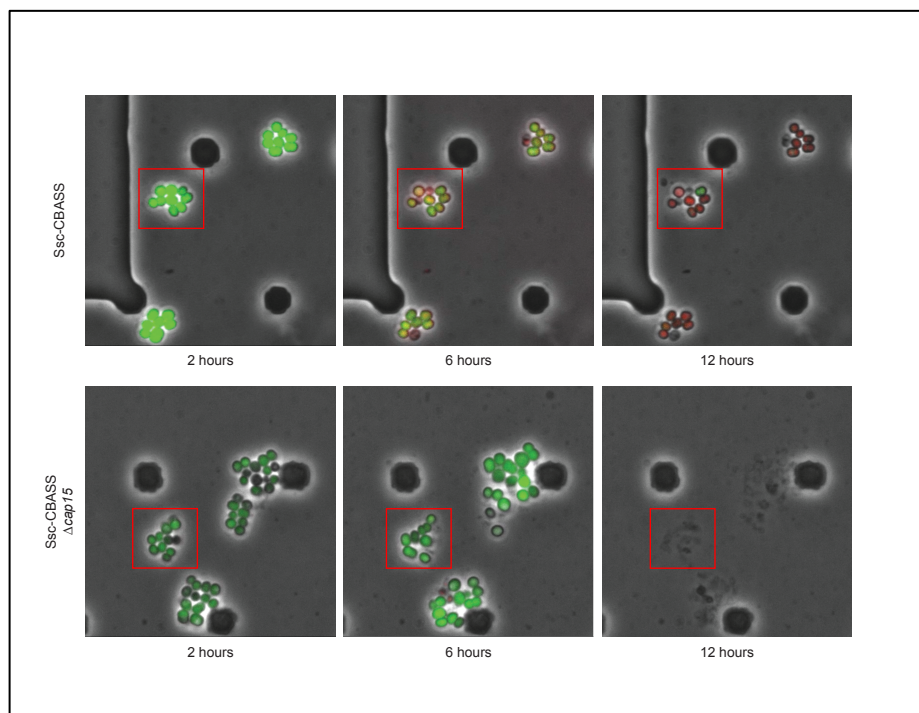

GFP channel = phage replication

RFP channel = propidium iodide staining, representing membrane disruption

Original source images for data obtained by TLC separation of cyclic nucleotides followed by phosphor screen imaging

Box indicates location of cropped images in **Figure S2D**

**AS)**

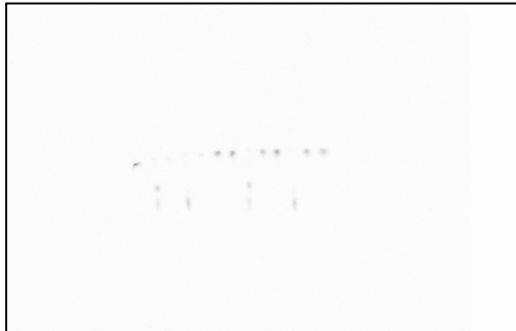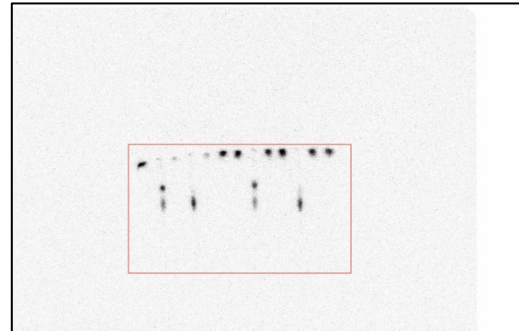

phosphor  
screen  $\alpha$ -<sup>32</sup>P  
NTPs

imageJ auto  
contrast  
applied to  
image on the  
right

Original source images for data obtained by TLC separation of cyclic nucleotides followed by phosphor screen imaging

Box indicates location of cropped images in **Figure S2G**

AT)

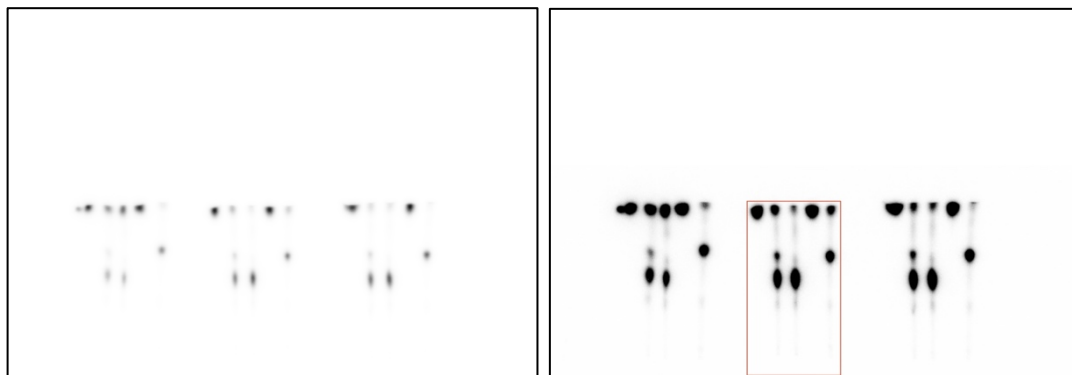

phosphor  
screen  $\alpha$ -<sup>32</sup>P  
NTPs

imageJ auto  
contrast  
applied to  
image on  
the right

Original source images for data obtained by electrophoretic separation of RNA followed by northern blot

Box indicates location of cropped images in **Figure S2I**

**AU)**

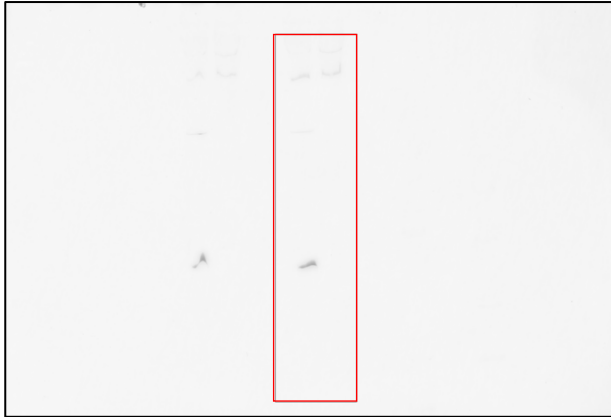

**northern blot** of one gel/membrane probed with 1  
3'FAC dsDNA probe visualized in one fluorescence  
channel

**Ladder** Jena bioscience fluorescent low range  
DNA ladder



Original source images for data obtained by TLC separation of cyclic nucleotides followed by phosphor screen imaging & for data obtained by electrophoretic separation

Box indicates location of cropped images in **Figure S3B**

**AV)**

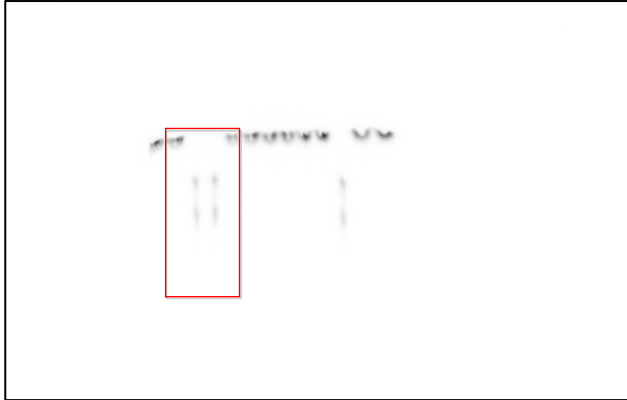

phosphor screen  $\alpha$ -<sup>32</sup>P NTPs

**AW)**

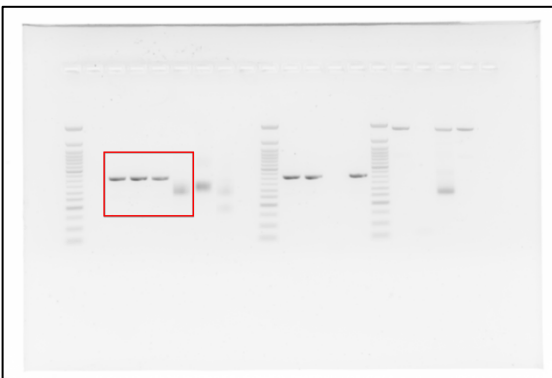

stained with ethidium bromide  
Ladder: new England biolabs 50 bp DNA ladder

**AX)**

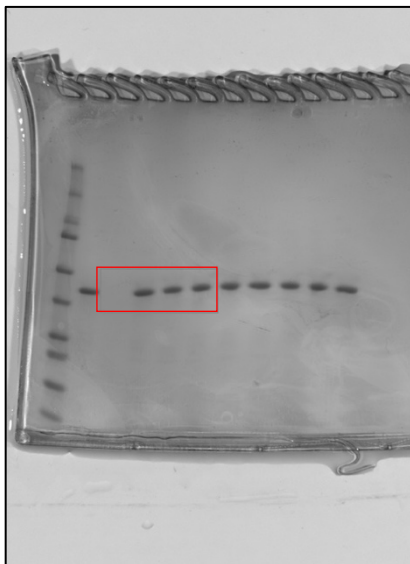

stained with Coomassie blue  
Ladder: Bio-rad Precision Plus Protein Dual Color Standard

Original source images for data obtained by TLC separation of cyclic nucleotides followed by phosphor screen imaging

Box indicates location of cropped images in **Figure S3C**

**AY)**

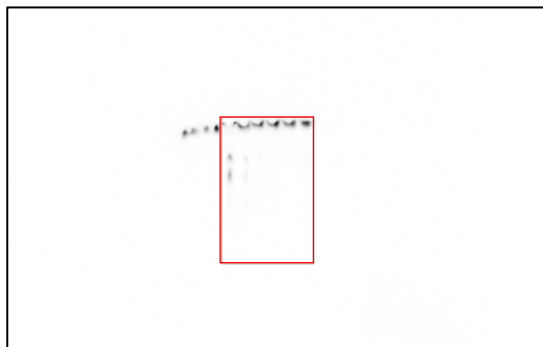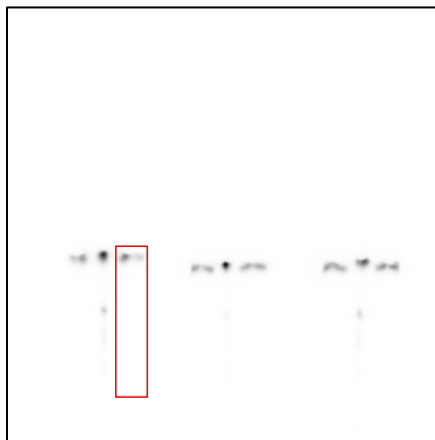

phosphor screen  $\alpha$ -<sup>32</sup>P NTPs

Original source images for data for data obtained by electrophoretic separation

Box indicates location of cropped images in **Figure S3F**

**AZ)**

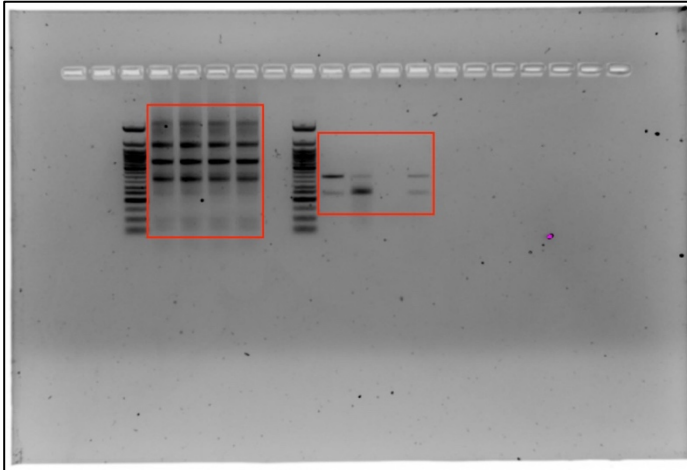

stained with ethidium bromide  
Ladder: new England biolabs 50 bp DNA  
ladder

Original source images for data obtained by electrophoretic separation

Box indicates location of cropped images in **Figure S4G**

**BA)**

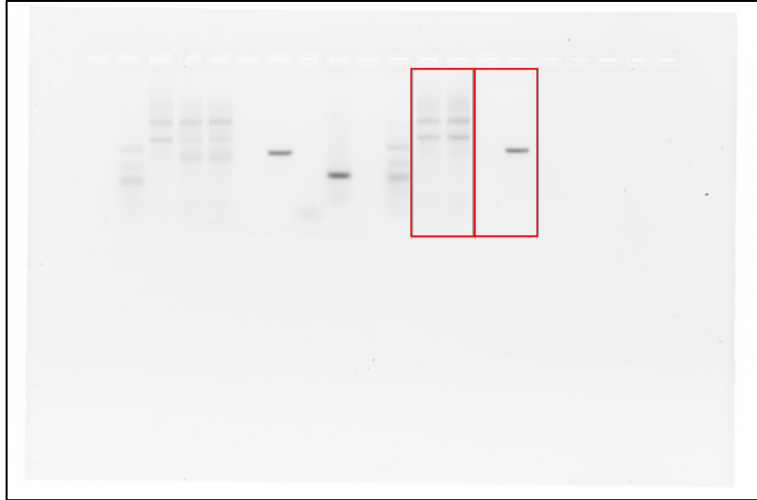

stained with ethidium bromide  
Ladder: new England Biolabs 50 bp  
DNA ladder

Original source images for data obtained by spotting phage on lawns of staphylococci

Box indicates location of cropped images in **Figure S6A**

**BB)**

**BC)**

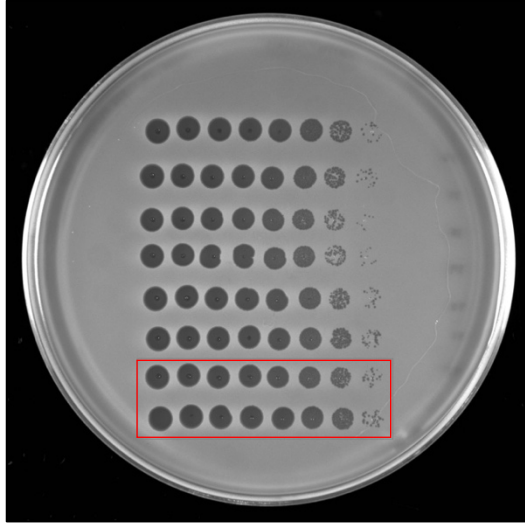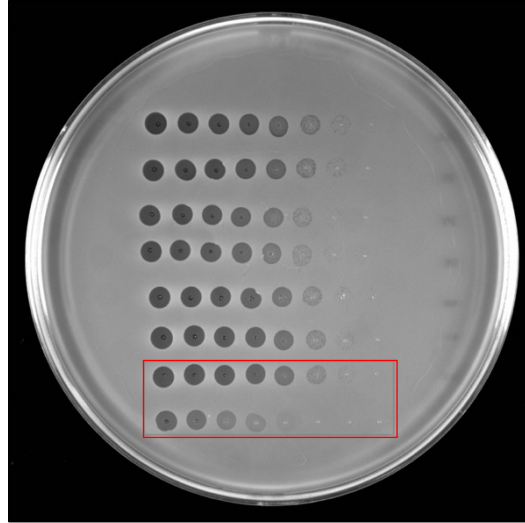

Replicates EMS  
treated phage  
libraries

1

2

3

4

5

6

7

wild-type

RN4220

RN4220 + pSscCBASS

Original source images for data obtained by spotting phage on lawns of staphylococci

Box indicates location of cropped images in **Figure S6D**

**BD)**

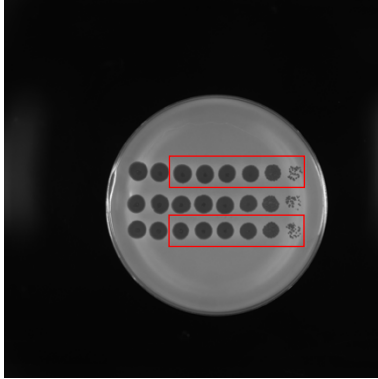

RN4220 + empty vector

**BE)**

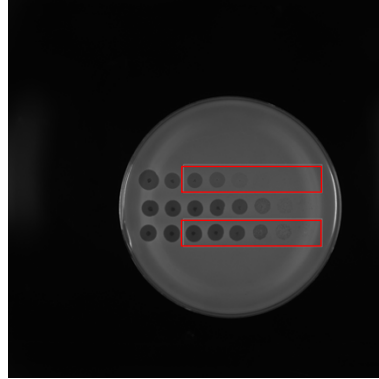

RN4220 + pCBASS

**BF)**

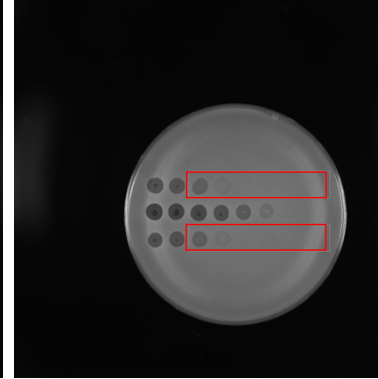

RN4220 + pCBASS + pGp46

$\phi$ 80 $\alpha$  wt  
 $\phi$ 80 $\alpha$  gp40  
S74F  
 $\phi$ 80 $\alpha$  gp46  
D105E

Original source images for data obtained by TLC separation of cyclic nucleotides followed by phosphor screen imaging

Box indicates location of cropped images in **Figure S6E**

**BG)**

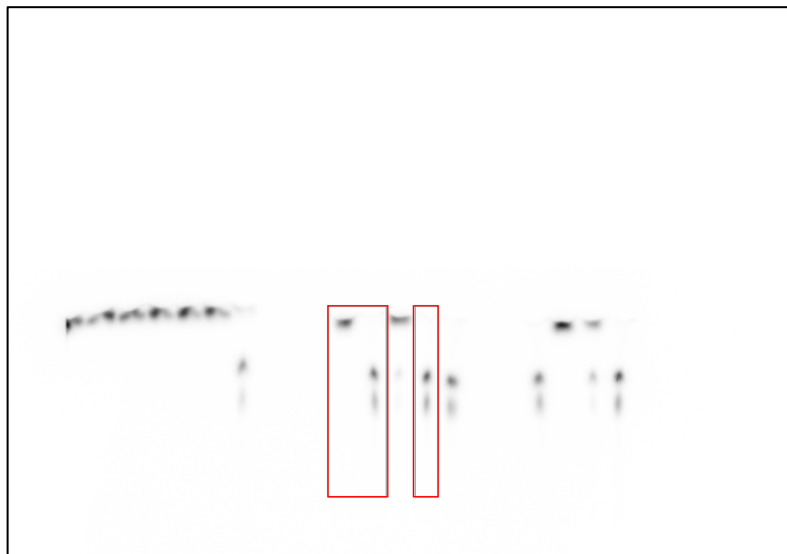

phosphor screen  $\alpha$ -<sup>32</sup>P NTPs

Original source images for data for data obtained by electrophoretic separation

Box indicates location of cropped images in **Figure S7A**

**BH)**

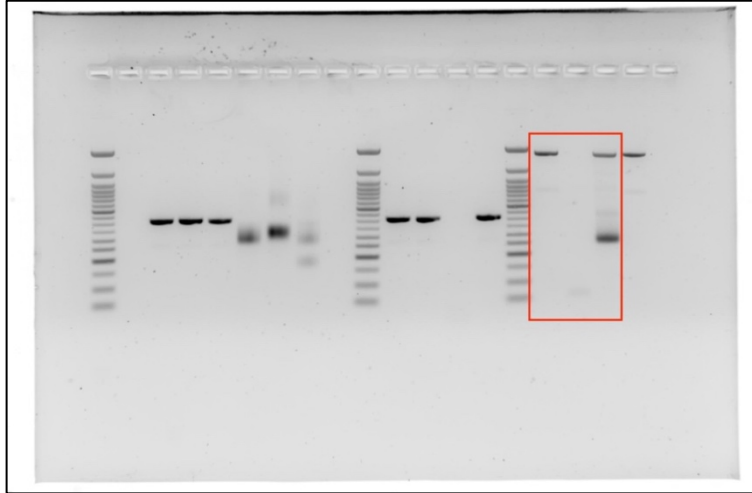

stained with ethidium bromide  
Ladder: new England biolabs 50 bp  
DNA ladder



Original source images for data for data obtained by electrophoretic mobility assay

Box indicates location of cropped images in **Figure S7B**

**BI)**

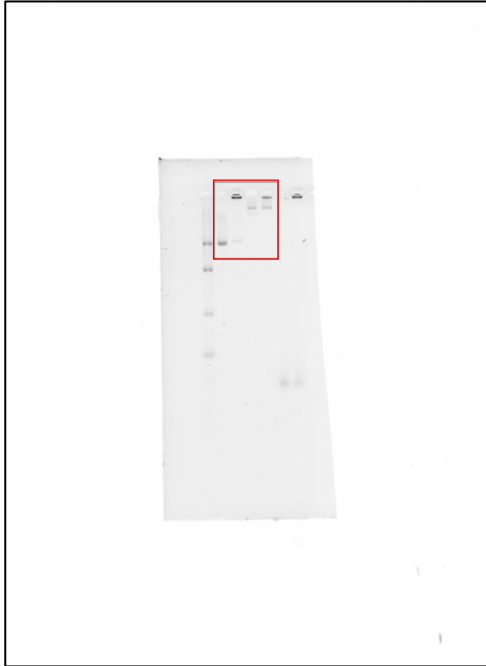

stained with ethidium bromide  
Ladder: new England biolabs dsRNA ladder

Original source images for data obtained by TLC separation of cyclic nucleotides followed by phosphor screen imaging

Box indicates location of cropped images in **Figure S7D**

**BJ)**

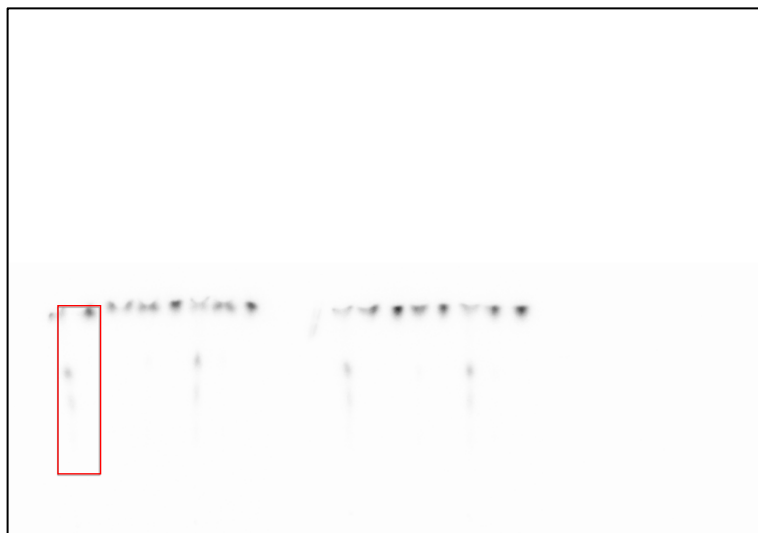

phosphor screen  $\alpha$ -<sup>32</sup>P NTPs

Original source images for data obtained by spotting phage on lawns of staphylococci

Box indicates location of cropped images in **Figure S7E**

**BK)**

**BL)**

**BM)**

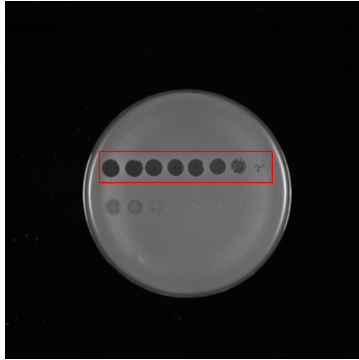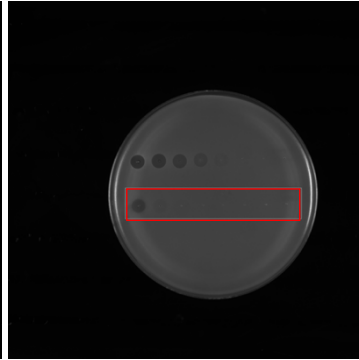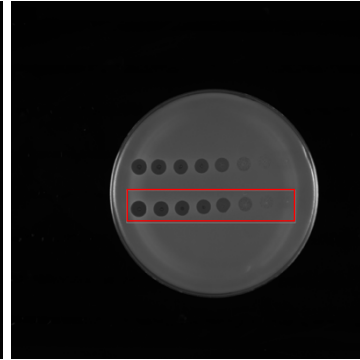

$\phi$ NM1 propagated strains listed below

Spotted serial dilutions on the same strain

RN4220:Ssc-CdnE03 pTerS<sup>S74F</sup>

RN4220:Ssc-CBASS pTerS

RN4220:Ssc-CBASS pTerS<sup>S74F</sup>

Original source images for data obtained by spotting phage on lawns of staphylococci

Box indicates location of cropped images in **Figure S8B**

**BN)**

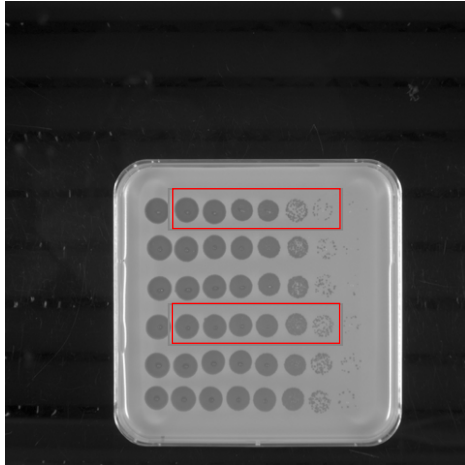

RN4220::SscCdnE03

**BO)**

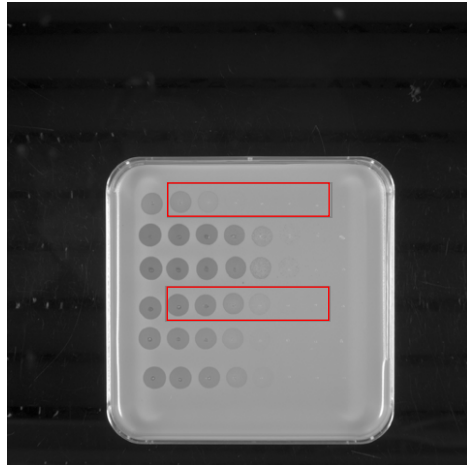

RN4220::CBASS

$\phi 80\alpha$  wt

$\phi 80\alpha$  cabRNA<sup>122</sup>

Original source images for data obtained by TLC separation of cyclic nucleotides followed by phosphor screen imaging

Box indicates location of cropped images in **Figure S8C**

**BP)**

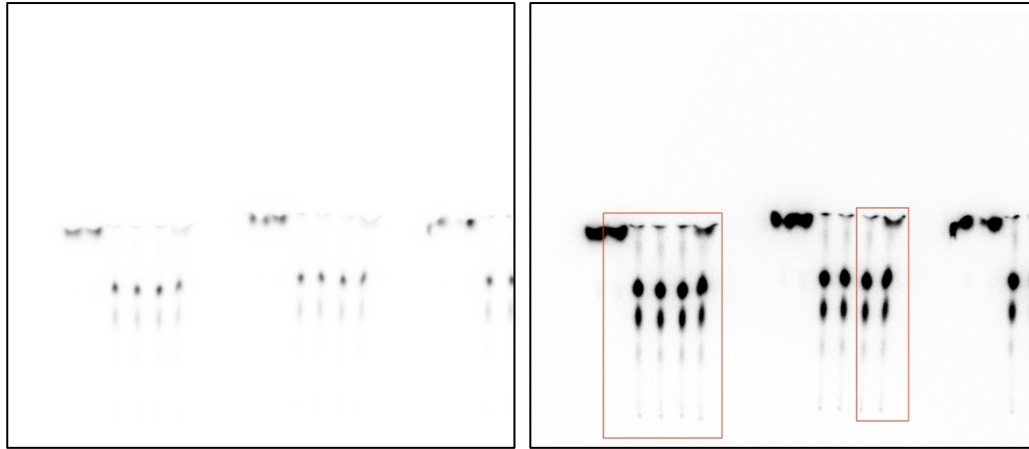

phosphor  
screen  $\alpha$ -<sup>32</sup>P  
NTPs

imageJ auto  
contrast applied  
to image on the  
right

**BQ)**

Reference for DNA/RNA gel ladders

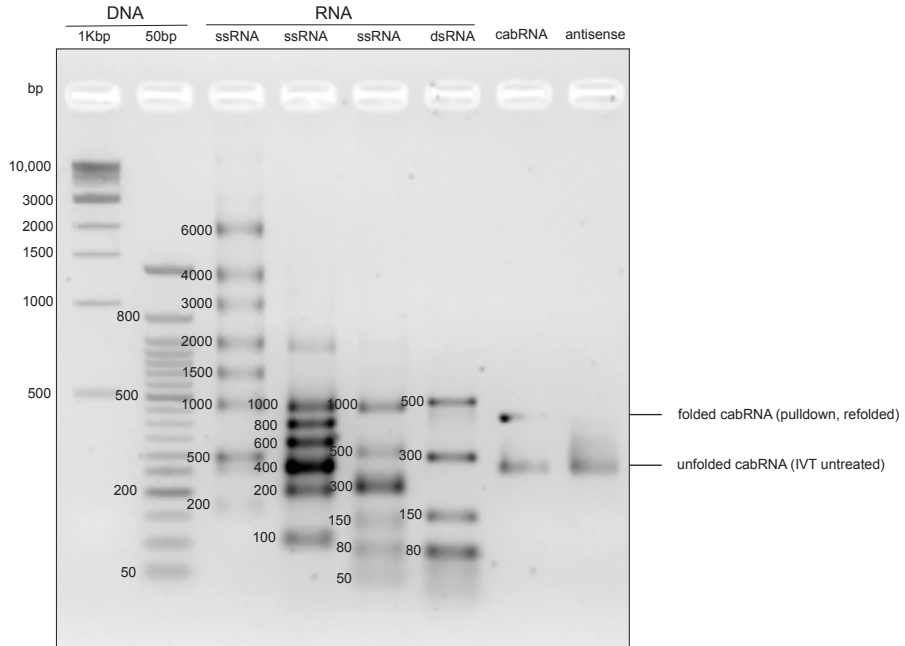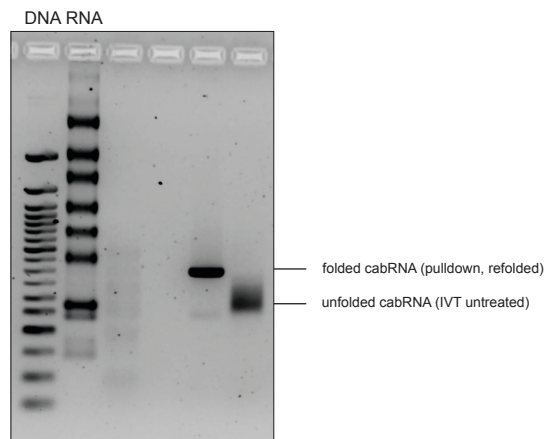

Supplement: 41586_2023_6743_MOESM3_ESM.pdf [file 41586_2023_6743_MOESM3_ESM.pdf]
