# Supplementary material for: Bacterial cGAS senses a viral RNA to initiate immunity
Source: PubMed Central journal article supplement (PMC10686824; doi:10.1038/s41586-023-06743-9), 2023-11-15

## SUPPLEMENTARY SEQUENCES FILE.

### Sequences of RNA species pulled down from infected cells using Ssc-CdnE03

#### 400-nt bacteriophage RNA pulled down during $\Phi 80\alpha$ -vir infection ( $cabRNA_{\Phi 80\alpha}$ ):

5'-

AGAGGAGAACCUCAAGAGGCCUACAGUAAGAAUAUGACCAUUUAAACGAUGAA  
GUGGAAAAGAGGUUACUACACAAUCACACCAACUUUUGAAGAGCGUCAGAGA  
UCUAUUGACCACAUACUAAAAGUUCAUGGUGCGUAUAUCGACAAAAAAGAAUUA  
CUCAGAAGAAUAUUGAGAUUAAUAUUGGUGAGUACGAUGACGAAAGUUAAAUUA  
AACUUUAACAAACCAUCUAAUGUUUUCAACAGAAACAUUUCGAAAUACUAACCA  
AUUACGAUAACUUCACUGAAGUACAUAUACGGUGGAGGUUCGAGUGGUAAGUCUC  
ACGGCGUUUAUACAAAAAGUUGUACUAAAAGCAUUGCAAGACUGGAAAUAUCCUA  
GGCGUAUACUAUGGCCUUAGA-3'

Predicted structure:

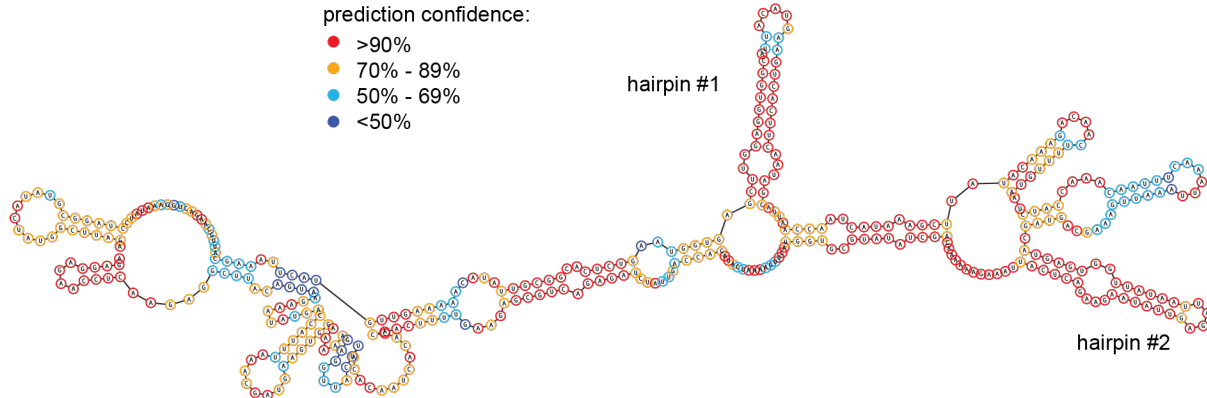

Hairpin #1 sequence:

5'-UACGAUAACUUCACUGAAGUACAUAUACGGUGGAGGUUCGAG-3'

Predicted structure:

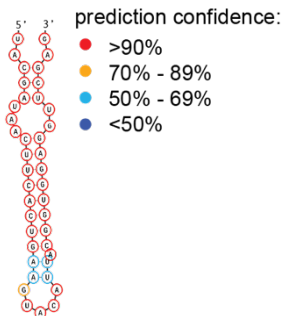

Hairpin #1 stem sequences:

5'-CUUCACUGAA-3'

3'-GAGGUGGCAUU-3'

Predicted structure:

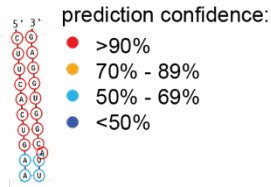

Hairpin #2 sequence:

5'-UACUCAGAAGAAUUAUUGAGAUUAAUAUUGGUGAGUA-3'

Predicted structure:

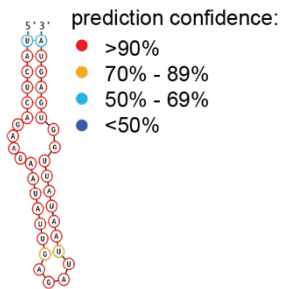

**1237-nt bacteriophage RNA pulled down during  $\Phi 80\alpha$ -vir gp40<sub>S74F</sub> infection:** 5'-  
AUGACUAAAAAGAAAUAUGGAUUAAAAUUUCAACAGUUCGAAAGUUAGAAGAUG  
AGUUGUGUGAUUAUCCUAAUUAUCAUAAGCAACUCGAAGAUUUAAGAAGUGAAA  
UAAUGACACCAUGGAUUCACAGAUACAAAUAUAGGCGGGGAGUUUGUACCGU  
CUAAUACAUCGAAAACAGAAUUGGCAGUAACUAAUUUUCUUUGUAGUAUACGAAG  
AGGUAAAUCCUUGAGUUUAAGAGCGCUAUUGAACGUAAAUAACAACAUAAG  
UAGGAAAGAACGCGAAUUCAUUCAAGAGUAUUUUUAAUAAAAAGGAAUUAGU  
GAAAGUUUGUGAUGACAUAACAUAUUCUGAUAGAACUGCUCUAAGAAUCAAAG  
GAAAUCAUAUCUAGAUUGGCGGAAGAGUUAGGGGAAGAGUGAAAUUGGCAGUA  
AAGUGGCAGUUUUUGAUACCUAAAAUGAGAUUUUAUGAUAGUGUAGGAUUUGA  
CUAUCUUACUGCGUUUCCCUUAUCGCAUUAGGAAUAAAGGAUCUAUGUGGGUU  
GGCUGAUUAUAGCCAAUCCUUUUUUAAUUUUUAAAAAGCGUAUAGCGCGAGAGUU  
GGUGGUAUUUGAAUUGAACGAAAAACAAAAGAGAUUCGCAGAUAGAAUUAUUAUG  
AAUGGAUGUAAUGGUAAAAAAGCAGCAAUUUCAGCAGGUUAUAGUAAGAAAACA  
GCAGAGUCUUUAGCAAGUCGAUUGUUUAAGAAAUGUUAAUGUUUCGGAAUUAUU  
AAAGAACGAUUAGAACAGAUACAAGAAGAGCGUUUAAUGAGCAUUACAGAAGCU  
UUAGCGUUAUCUGCUUUUAUUGCUAGAGGAGAACCUCACAGAGGCUUACAGUAAG  
AAUAUGACCAUUUAAACGAUGAAGUGGAAAAAGAGGUUACUUACACAAUCACAC  
CAACUUUUGAAGAGCGUCAGAGAUUAUUGACCACAUACUAAAAGUUCAUGGUG  
CGUAUAUCGACAAAAAAGAAUUACUCAGAAGAAUUAUUGAGAUUAAUUAUUGGUGA  
GUACGAUGACGAAAGUUAAAUAACUUUAACAAACCAUCUAAUGUUUUCAACAG  
AAACAUAUUCGAAUACUACCAAUUACGAUAACUUCACUGAAGUACAUAUACGGU  
GGAGGUUCGAGUGGUAAGUCUCACGGCGUUUAUACAAAAGUUGUACUUAAGCA  
UUGCAAGACUGGAAUUAUCCUAGGCGUAUACUAUGGCUUAGA-3'

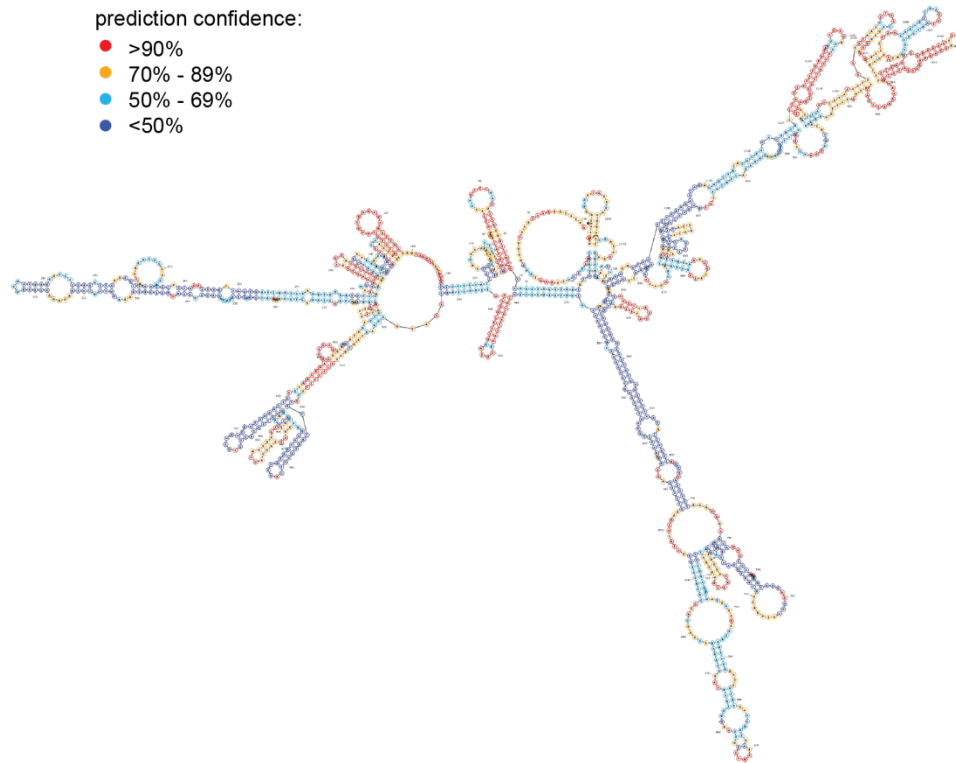

**400-nt bacteriophage RNA pulled down during  $\Phi$ NM1 $\gamma$ 6 infection ( $cabRNA_{\Phi$ NM1 $\gamma$ 6):**

5'-

AGAGGAGAACCUCAAGAGGCUUACAGUAAGAAUAUGACCAUUUAAACGAUGAA  
 GUGGAAAAGAGGUUACUACACAAUCACACCAACUUUUGAAGAGCGUCAGAGA  
 UCUAUUGACCACAUACUAAAAGUACAUGGUGCGUAUAUCGAUAAAAAAGAAUUA  
 CUCAGAAGAAUAUUGAGAUUAAUAUUGGUGAGUACGAUGACGAAAGUUAAAUA  
 AACUUUAACAAACCAUCUAAUGUUUUCAAUAGAAACAUAUUCGAAAUACUAACCA  
 AUUACGAUAACUUCACUGAAGUACAUAUACGGUGGAGGUUCGAGCGGUAAGUCUC  
 ACGGCGUUAUACAAAAGUUGUACUUAAGCAUUGCAAGACUGGAAUAUCCUA  
 GGCGUAUACUAUGGCUUAGA-3'

**80-nt bacteriophage RNA pulled down during  $\Phi$ 80 $\alpha$ -vir( $cabRNA^{100}$ ):5'-**

AUGGUGCGUAUAUCGACAAAAAAGAAUUACUCAGAAGAAUAUUGAGAUUAAUAU  
 UGGUGAGUACGAUGACGAAAGUUAA-3'

Predicted structure:

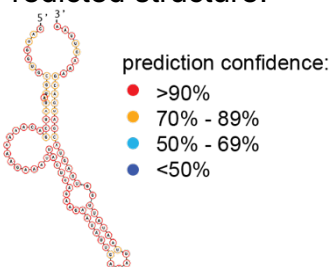

**200-nt bacteriophage RNA pulled down during  $\Phi 80\alpha$ -vir(*cabRNA*<sup>57</sup>):**5'-  
 AGAGGAGAACCUCAAGAGGCCUUACAGUAAGAAUAUGACCAUUUAAAACGAUGAA  
 GUGGAAAAAGAGGUUACUUACACAAUCACACCAACUUUUGAAGAGCGUCAGAGA  
 UCUAUUGACCACAUACUAAAAGUUCAUGGUGCGUAUAUCGACAAAAAAGAAUUA  
 CUCAGAAGAAUAUUGAGAUUAAUAUUGGUGAGUACGA-3'

Predicted structure:

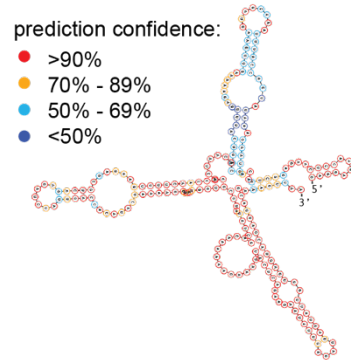

**34-nt bacteriophage RNA pulled down during  $\Phi J1$  and  $\Phi J2$  infection (*cabRNA* <sub>$\Phi J1/2$</sub> ):**

5'-GAATGTTATGGCAATGCTACTAAGTCAGCTGTGC-3'

Predicted structure:

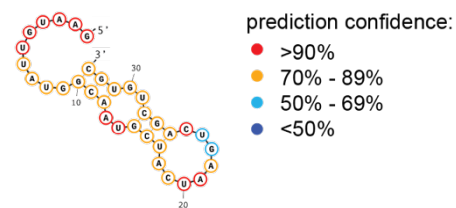

**49-nt bacteriophage RNA pulled down during  $\Phi J4$  infection (*cabRNA* <sub>$\Phi J4$</sub> ):**

5'-TTCCGGAAGATGATTAGTCATGTATGAAATACTTGATCTAAAAAATAAA-3'

Predicted structure:

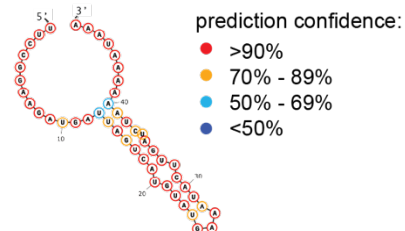

## Sequence of the RNA species pulled down from infected cells using Sha-CdnE01

### **400-nt bacteriophage RNA pulled down during $\Phi 80\alpha$ -vir infection ( $cabRNA_{\Phi 80\alpha}$ ):**

5'-

AGAGGAGAACCUC AAGAGGCCU UACAGUA AAGAAUA UGACCAU UUAAACGAUGAA  
GUGGAAAAAGAGGUUACU UACACAAUCACACCAACU UUUGAAGAGCGUCAGAGA  
UCUAUUGACCACAUACUAAAAGUUCAUGGGUGCGUAUAUCGACAAAAAAGAAUUA  
CUCAGAAGAAUAUUGAGAUUAAUAUUGGUGAGUACGAUGACGAAAGUUAAAUUA  
AACUUUAACAAACCAUCUAAUGUUUUCAACAGAAACAUAUUCGAAAUACUAACCA  
AUUACGAUAACUUCACUGAAGUACAUAUACGGUGGAGGUUCGAGUGGUAAGUCUC  
ACGGCGUUAUACAAAAGUUGUACUUAAGCAUUGCAAGACUGGAAAUAUCCUA  
GGCGUAUACUAUGGCCUJAGA-3'

### **70-nt bacteriophage RNA pulled down during $\Phi 80\alpha$ -vir infection (hairpin #1):**

5'-  
UAUUCGAAUACUAACCAAUUACGAUAACUUCACUGAAGUACAUAUACGGUGGAG  
GUUCGAGUGGUAAGUC -3'

Predicted structure:

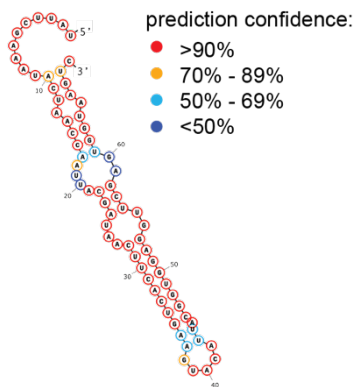

**Sequences of gp40 from bacteriophages used in this study:**

**gp40 sequence from  $\Phi 80\alpha$ -vir: 5'-**

ATGAACGAAAAACAAAAGAGATTCGCAGATGAATATATAATGAATGGATGTAATGGT  
AAAAAAGCAGCAATTTTCAGCAGGTTATAGTAAGAAAACAGCAGAGTCTTTAGCAAG  
TCGATTGTTAAGAAATGTTAATGTTTCGGAATATATTAAGAACGATTAGAACAGAT  
ACAAGAAGAGCGTTTAATGAGCATTACAGAAGCTTTAGCGTTATCTGCTTCTATTGC  
TAGAGGAGAACCTCAAGAGGCTTACAGTAAGAAATATGACCATTTAAACGATGAAG  
TGGAAAAAGAGGTTACTTACACAATCACACCAACTTTTGAAGAGCGTCAGAGATCT  
ATTGACCACATACTAAAAGTTCATGGTGCGTATATCGACAAAAAAGAAATTAATCTCAG  
AAGAATATTGAGATTAATATTGGTGAGTACGATGACGAAAGTTAA-3'

**gp40 sequence from  $\Phi 80\alpha$ -vir gp40<sub>S74F</sub>: 5'-**

ATGAACGAAAAACAAAAGAGATTCGCAGATGAATATATAATGAATGGATGTAATGGT  
AAAAAAGCAGCAATTTTCAGCAGGTTATAGTAAGAAAACAGCAGAGTCTTTAGCAAG  
TCGATTGTTAAGAAATGTTAATGTTTCGGAATATATTAAGAACGATTAGAACAGAT  
ACAAGAAGAGCGTTTAATGAGCATTACAGAAGCTTTAGCGTTATCTGCTTTATTGC  
TAGAGGAGAACCTCAAGAGGCTTACAGTAAGAAATATGACCATTTAAACGATGAAG  
TGGAAAAAGAGGTTACTTACACAATCACACCAACTTTTGAAGAGCGTCAGAGATCT  
ATTGACCACATACTAAAAGTTCATGGTGCGTATATCGACAAAAAAGAAATTAATCTCAG  
AAGAATATTGAGATTAATATTGGTGAGTACGATGACGAAAGTTAA-3'

**gp40 sequence from  $\Phi$ NM1 $\gamma$ 6: 5'-**

ATGAACGAAAAACAAAAGAGATTCGCAGATGAATATATAATGAATGGATGTAATGGT  
AAAAAAGCAGCAATTACAGCAGGTTATAGTAAGAAAACAGCAGAGTCTTTAGCAAG  
TCGATTGTTAAGAAATGTTAATGTTTCGGAATATATTAAGAACGATTAGAACAGAT  
ACAAGAAGAGCGTTTAATGAGTATTACAGAAGCTTTAGCGTTATCTGCTTCTATTGC  
TAGAGGAGAACCTCAAGAGGCTTACAGTAAGAAATATGACCATTTAAACGATGAAG  
TGGAAAAAGAGGTTACTTACACAATCACACCAACTTTTGAAGAGCGTCAGAGATCT  
ATTGACCACATACTAAAAGTACATGGTGCGTATATCGATAAAAAAAGAAATTAATCTCAG  
AAGAATATTGAGATTAATATTGGTGAGTACGATGACGAAAGTTAA-3'

**gp40 sequence from  $\Phi$ NM1 $\gamma$ 6 gp40<sub>S74F</sub> recombinant: 5'-**

ATGAACGAAAAACAAAAGAGATTCGCAGATGAATATATAATGAATGGATGTAATGGT  
AAAAAAGCAGCAATTTTCAGCAGGTTATAGTAAGAAAACAGCAGAGTCTTTAGCAAG  
TCGATTGTTAAGAAATGTTAATGTTTCGGAATATATTAAGAACGATTAGAACAGAT  
ACAAGAAGAGCGTTTAATGAGCATTACAGAAGCTTTAGCGTTATCTGCTTTATTGC  
TAGAGGAGAACCTCAAGAGGCTTACAGTAAGAAATATGACCATTTAAACGATGAAG  
TGGAAAAAGAGGTTACTTACACAATCACACCAACTTTTGAAGAGCGTCAGAGATCT  
ATTGACCACATACTAAAAGTTCATGGTGCGTATATCGACAAAAAAGAAATTAATCTCAG  
AAGAATATTGAGATTAATATTGGTGAGTACGATGACGAAAGTTAA-3'

Mutated cabRNA DNA sequences (5'-3') from  $\Phi 80\alpha$  used in this study. The sequence coding TerS C-terminal amino acid residues (DDES\*) and TerL N-terminus (MMTKVK) is underlined; mutations introduced are in red.

#### $\Phi 80\alpha$ -vir

AGAGGAGAACCTCAAGAGGCTTACAGTAAGAAATATGACCATTTAAACGATGAAGT  
 GGAAAAAGAGGTTACTTACACAATCACACCAACTTTTGAAGAGCGTCAGAGATCTA  
 TTGACCACATACTAAAAGTTCATGGTGCGTATATCGACAAAAAAGAAATTA<sup>CTCAGA</sup>  
 AGAATATTGAGATTAATATTGGTGAGTACGATGACGAAAGTTAAATTAAACTTTAAC  
 AAACCATCTAATGTTTTCAACAGAAACATATTCGAAATACTAACCAATTACGATAACT  
 TCACTGAAGTACATTACGGTGGAGGTTTCGAGTGGTAAGTCTCACGGCGTTATACAA  
 AAAGTTGTA<sup>CTTAAAGCATTGCAAGACTG</sup>GAAATATCCTAGGCGTATACTATGGCTT  
 AGA

#### $\Phi 80\alpha$ -vir(cabRNA<sup>122</sup>)

AGGGGGGAGCCCAAGAAGCCTATAGCAAAAAGTACGATCACTTGAATGACGAGG  
 TAGAGAAGGAAGTCACCTATACGATTACGCCGACCTTCGAGGAACGCCAAAGGTC  
 CATCGATCATATCCTGAAGGTCCACGGCGCATAATTGATAAGAAGGAGATCACCC  
 AAAAAACATCGAATCAACATCGGCCGAATATGATGACGAAAGTTAAGTTGAATTC  
 AATAAGCCGTCCAACGTCTTTAATAGGAATATATTTGAGATACTGACTAACTATGAC  
 AATTTTACCGAGGTGCACTATGGCGGGGGCTCTAGCGGCAAATCCCATGGTGTCA  
 TACAGAAGGTCGTGCTCAAGGCGTTACAGGATTGGAAGTACCCAGACGCATACT  
 GTGGCTCAGG

Predicted RNA structure:

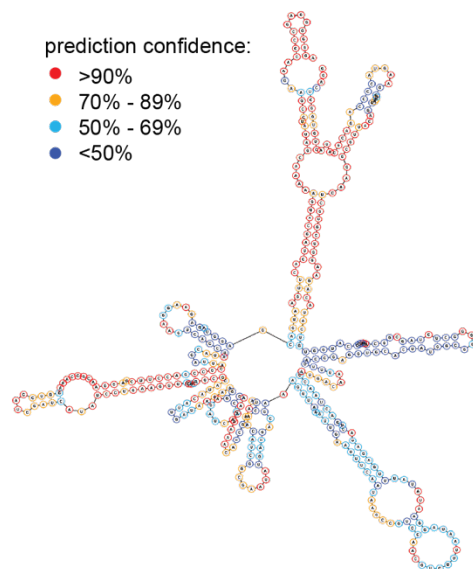

#### $\Phi 80\alpha$ -vir(cabRNA<sup>100</sup>)

AGGGGGGAGCCCAAGAAGCCTATAGCAAAAAGTACGATCACTTGAATGACGAGG  
 TAGAGAAGGAAGTCACCTATACGATTACGCCGACCTTCGAGGAACGCCAAAGGTC  
 CATCGATCATATCCTGAAGGTCCATGGTGCGTATATCGACAAAAAAGAAATTA<sup>CTC</sup>

AGAAGAATATTGAGATTAATATTGGTGAGTACGATGACGAAAGTTAAGTTGAATTTCAATAAGCCGTCCAACGTCTTTAATAGGAATATATTTGAGATACTGACTAACTATGACAAATTTACCGAGGTGCACTATGGCGGGGGCTCTAGCGGCAAATCCCATGGTGTCA TACAGAAGGTCTGTGCTCAAGGCGTTACAGGATTGGAAGTACCCAGACGCATACTGTGGCTCAGG

Predicted RNA structure:

prediction confidence:

- >90%
- 70% - 89%
- 50% - 69%
- <50%

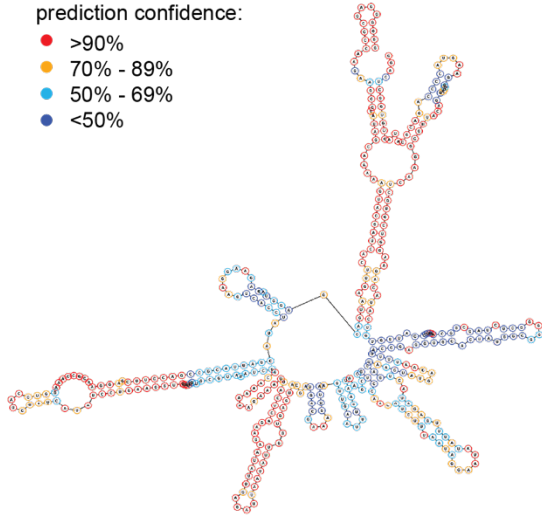

**Φ80α-vir(cabRNA<sup>57</sup>)**

AGAGGAGAACCTCAAGAGGCTTACAGTAAGAAATATGACCATTTAAACGATGAAGTGGAAAAAGAGGTTACTTACACAATCACACCAACTTTTGAAGAGCGTCAGAGATCTATTGACCACATACTAAAAGTTCATGGTGCGTATATCGACAAAAAAGAAATTACTCAGAAGAATATTGAGATTAATATTGGTGAGTACGATGACGAAAGTTAAGTTGAATTTCAATAAGCCGTCCAACGTCTTTAATAGGAATATATTTGAGATACTGACTAACTATGACAATTTTACCGAGGTGCACTATGGCGGGGGCTCTAGCGGCAAATCCCATGGTGTCAATACAGAAGGTCTGTGCTCAAGGCGTTACAGGATTGGAAGTACCCAGACGCATACTGTGGCTCAGG

Predicted RNA structure:

prediction confidence:

- >90%
- 70% - 89%
- 50% - 69%
- <50%

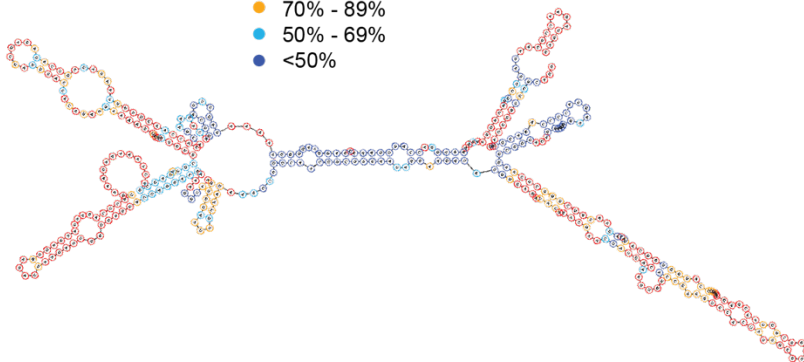

Supplement: 41586_2023_6743_MOESM6_ESM.pdf [file 41586_2023_6743_MOESM6_ESM.pdf]
